# Supplementary material for: Tapping into the coordinative potential of a C-functional 1,4-diphosphabarrelene using two sets of complementary ligand centres
Source: Royal Society of Chemistry journal article supplement (doi:10.1039/d4dt01817f), 2024-01-01
Supplement: d4dt01817f1.pdf [file d4dt01817f1.pdf]

## Supplementary Information

### **Untapping the coordinative potential of a C-functional 1,4-diphosphabarrelene using two sets of complimentary ligand centres**

Tatjana Terschüren,<sup>a</sup> Gregor Schnakenburg<sup>a</sup> and Rainer Streubel<sup>\*a</sup>

<sup>a</sup>Prof. Dr. Rainer Streubel, M. Sc. Tatjana Terschüren, Dr. Gregor Schnakenburg, Institute of Inorganic Chemistry, Rheinische Friedrich-Wilhelms-Universität Bonn, Gerhard-Domagk-Straße 1, 53121 Bonn, Germany., Email: r.streubel@uni-bonn.de.

## Table of contents

|                                                                     |           |
|---------------------------------------------------------------------|-----------|
| <b>1. General methods</b> .....                                     | <b>4</b>  |
| <b>2. Experimental procedures and characterisation</b> .....        | <b>6</b>  |
| 2.1. Synthesis of 2 .....                                           | 6         |
| 2.2. Generation of 3 .....                                          | 6         |
| 2.3. Generation of 4 .....                                          | 7         |
| 2.4. Synthesis of 5 .....                                           | 7         |
| 2.5. Methylation of 2.....                                          | 8         |
| 2.6. Synthesis of 6 .....                                           | 9         |
| 2.7. Synthesis of 7 .....                                           | 10        |
| 2.8. Generation of 8 .....                                          | 11        |
| 2.9. Synthesis of 9 .....                                           | 11        |
| 2.10. Generation of 10 .....                                        | 12        |
| 2.11. Synthesis of 11 .....                                         | 13        |
| <b>3. NMR spectra</b> .....                                         | <b>14</b> |
| 3.1. 2 .....                                                        | 14        |
| 3.2. 3 in reaction mixture .....                                    | 15        |
| 3.3. 4 in reaction mixture .....                                    | 16        |
| 3.4. 5 .....                                                        | 16        |
| 3.5. Methylation product of 2 .....                                 | 18        |
| 3.6. 6 .....                                                        | 19        |
| 3.7. 7 .....                                                        | 21        |
| 3.8. 8 in reaction mixture .....                                    | 22        |
| 3.9. 9 .....                                                        | 23        |
| 3.10. Simulated $^{31}\text{P}\{^1\text{H}\}$ NMR signal of 9 ..... | 24        |
| 3.11. 10 in reaction mixture .....                                  | 25        |
| 3.12. 11 .....                                                      | 25        |
| <b>4. Single crystal X-ray diffraction studies</b> .....            | <b>27</b> |
| 4.1. 4 .....                                                        | 27        |
| 4.2. 5 .....                                                        | 29        |
| 4.3. 8 .....                                                        | 33        |
| 4.4. 9 .....                                                        | 34        |
| 4.5. 10 .....                                                       | 34        |
| 4.6. 11 .....                                                       | 35        |
| <b>5. Additional figures</b> .....                                  | <b>36</b> |
| 5.1. FMOs of 2.....                                                 | 36        |

|           |                                    |           |
|-----------|------------------------------------|-----------|
| 5.2.      | FMOs of 7.....                     | 36        |
| <b>6.</b> | <b>Computational details .....</b> | <b>37</b> |
| 6.1.      | 1 <sup>Me</sup> .....              | 37        |
| 6.2.      | 2 <sup>Me</sup> .....              | 38        |
| 6.3.      | Ethene.....                        | 39        |
| 6.4.      | 2 <sup>Me</sup> -TS.....           | 39        |
| 6.5.      | 7 <sup>Me</sup> .....              | 40        |
| <b>7.</b> | <b>References.....</b>             | <b>42</b> |

## 1. General methods

All reactions were performed under dried and deoxygenated argon atmosphere using Schlenk or glovebox techniques. The used argon (>99.998%) was purified by a system of three columns (deoxygenation by a BTS copper catalyst (BASF PuriStar® R3-15S) at ca. 100 °C, removing moisture with silica gel, phosphorus pentoxide desiccant with indicator (Sicapent®) and calcium chloride). Glassware, spatulae, cannulae as well as filter papers were dried in a compartment dryer at 80 °C for at least one hour. Additionally, the glassware was heated with a heat gun (up to 550 °C) under active vacuum ( $< 5 \cdot 10^{-2}$  mbar) and filled with argon. Sterile syringes were purged with argon three times before use. The solvents were dried by standard procedures by refluxing over proper desiccants under an argon atmosphere (*n*-pentane and toluene over sodium wire ( $\varnothing = 2$  mm); diethyl ether stabilised with 3,5-di-*t*-butyl-4-hydroxytoluene (BHT) and tetrahydrofuran over benzophenone and sodium wire; dichloromethane over calcium hydride) for several days and distilled before use. Alternatively, diethyl ether and toluene were dried using a MBraun SPS-800 solvent purification system. For filtration Schlenk frits or stainless steel cannulae ( $\varnothing = 1$  mm and 2 mm) with Whatman® glass microfiber filters (grade GF/A) were used. After use, devices made of stainless steel were cleaned with deionised water and acetone and glassware by storage in a concentrated solution of potassium hydroxide in isopropanol for at least two days and in diluted hydrochloric acid for at least four hours. Afterwards, the glassware was washed with water and soap, deionised water and acetone. All joints were greased with OKS 1112 grease or with PTFE paste (Carl Roth). Vacuum was applied by a rotary vane pump (vacuubrand RZ6) enabling pressures  $< 10^{-2}$  mbar.

NMR spectra were recorded on a Bruker Avance I 300 MHz, Bruker Avance I 400 MHz, Bruker Avance I 500 MHz or Bruker Avance III HD Ascend 500 MHz spectrometer at the NMR department of the University of Bonn and subsequently analysed by the program *MestReNova 14.2*. The calibration of the  $^1\text{H}$  and  $^{13}\text{C}$  NMR spectra was done via the solvent residual signals relative to tetramethylsilane (<1% in  $\text{CDCl}_3$ ) ( $\text{C}_6\text{D}_6$ :  $\delta(^1\text{H}) = 7.16$  ppm and  $\delta(^{13}\text{C}) = 128.06$  ppm,  $\text{CD}_2\text{Cl}_2$ :  $\delta(^1\text{H}) = 5.32$  ppm and  $\delta(^{13}\text{C}) = 53.84$  ppm).<sup>1</sup> All lock frequencies were calibrated internally against the  $^1\text{H}$  signals of solutions of tetramethylsilane with a volume fraction of  $\phi \leq 1\%$  in the corresponding deuterated solvent. The deuterated solvents were used without further purification and dried by storing over 3 Å ( $\text{CD}_2\text{Cl}_2$ ) or 4 Å ( $\text{C}_6\text{D}_6$ ) molecular sieves. The chemical shift ( $\delta$ ) is given in parts per million (ppm) and the coupling constant ( $^nJ_{X,Y}$ ) in Hertz (Hz) as absolute values neglecting the sign where *n* is the number of bonds between the coupling nuclei X and Y. For assigning the multiplicity following abbreviations were used: s = singlet, d = doublet, dd = doublet of doublets, m = multiplet, sat = satellites and br = broad. For  $^1\text{H}$  NMR spectra additionally the number of nuclei is given accordingly which is determined via integration. The  $^1\text{H}$  and  $^{13}\text{C}$  NMR signals of compounds were assigned by a combination of COSY, HSQC and HMBC experiments to unequivocally assign protons and carbon resonances if necessary. All measurements were performed at ambient temperature (298 K) if not stated otherwise.

Mass spectrometry using electrospray ionisation (ESI) or atmospheric-pressure chemical ionization (APCI) was performed on a Thermo Fisher Scientific Orbitrap XL mass spectrometer. Only selected data are given for detected ions. The peaks are given in mass-to-charge ratio (*m/z*) while only the isotopomer with the highest relative abundance is represented. Additionally, the relative intensities of the peaks are given in parentheses and the proposed molecule fragments in square brackets if not stated otherwise.

UV/vis spectra were recorded in the spectral range of 200–700 nm on a *Shimadzu UV-1650PC* spectrometer with a double-beam optic photometric system with a maximum wavelength range of 190.0 to 1100 nm, a spectra band width of 2 nm and a wavelength accuracy of  $\pm 0.5$  nm with an automatic wavelength correction. An automatic baseline correction with the pure solvent was performed before the analyte solution was measured. The detector is a silicon photodiode with a photometric range of  $-0.5$  to 3.999 absorbance. Quartz glass cuvettes (*Hellma* precision cells *110-QC*) with dimensions of 46 mm  $\times$  12.5 mm  $\times$  12.5 mm, a light path length of 10 mm and a chamber volume of 350  $\mu$ L were used and closed with PTFE caps before measurement. Measurements were started with a circa  $10^{-5}$  molar solution of the respective compound and diluted until a sufficient spectrum was recorded. All spectra are normed to an absorbance of 1 a.u.; no extinction coefficient were determined. Absorbance wavelengths are given in nanometers (nm) with the relative absorbance (max. 1) and assignment to the associated transition in parentheses.

IR spectra of solids were recorded in the spectral range of 4000-400  $\text{cm}^{-1}$  on a Bruker Alpha FTIR spectrometer with a single-reflection diamond ATR measurement or a Shimadzu IRSpirit FTIR spectrometer with a single-reflection germanium ATR measurement attachment in a glovebox at ambient temperature. All analyses were performed using the programs *EZ OMNIC 7.3* of Fisher Scientific and *OPUS* of Bruker. Only selected wavenumbers of the absorption bands are given using reciprocal centimetres ( $\text{cm}^{-1}$ ). The intensities of the bands are marked as very strong (vs), strong(s), medium (m), weak (w).

Elemental analyses were performed on a Elementar Vario Micro analysis device in quadruplicate or triplicate for each sample. All samples were prepared and weighed up in tin or silver sample containers using a micro-analytical balance in a glovebox. The mean C, H and N values are given for each compound.

Melting points were measured using a MPM-H2 device or a Büchi melting point determination device according to Dr. Tottoli. The samples were grease-sealed in a glass capillary ( $\varnothing = 0.1$  mm) in a glovebox and heated quickly (ca. 10 K/min) for a rough determination of the melting point or decomposition temperature. Afterwards, a heating rate of approximately 1 K/min was used until the sample melted or decomposed. No internal or external temperature corrections were performed.

Single crystal X-ray diffraction analyses were performed on a Bruker D8-Venture diffractometer at 100 K by using monochromated Cu-K $\alpha$  radiation ( $\lambda = 1.54178$  Å), a STOE IPDS-2T diffractometer at 123 K by using monochromated Mo-K $\alpha$  radiation ( $\lambda = 0.71073$  Å) or a STOE STADIVARI diffractometer at 100 K by using monochromated Cu-K $\alpha$  radiation ( $\lambda = 1.54178$  Å). Intensities were measured by fine-slicing  $\phi$  and  $\omega$  scans and corrected background, polarisation and Lorentz effects. A semi-empirical absorption correction was applied for the data sets following Blessing's method.<sup>2</sup> The structure was solved by direct methods and refined anisotropically by the least-squares procedure implemented in SHELX program system.<sup>3</sup> All non-hydrogen atoms were refined anisotropically. The hydrogen atoms were included isotropically refined using a riding model at the bound carbon atoms. The program *Olex2 1.5 of OlexSys*<sup>4</sup> was used for analyses and the ellipsoid representations of the molecular structures with the probability level set to 50%. Crystallographic data for the structures reported in this paper have been deposited with the Cambridge Crystallographic Data Centre as supplementary publication no. 2363298 (4) and 2363297 (5), which can be obtained free of charge via [www.ccdc.cam.ac.uk/data\\_request/cif](http://www.ccdc.cam.ac.uk/data_request/cif).

## 2. Experimental procedures and characterisation

### 2.1. Synthesis of 2

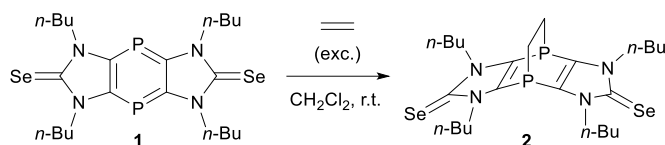

In a 20 mL Schlenk tube equipped with a stir bar 0.066 g (0.11 mmol, 1.0 eq.) of **1** were dissolved in 6 mL dichloromethane and the Argon atmosphere was exchanged for 1 atm ethene. After stirring for 1 h at ambient temperature the solution had turned orange and the solvent was removed *in vacuo* ( $\leq 0.05$  mbar). The resulting yellow to orange solid was washed four times with 2–4 mL *n*-pentane each and dried for 2 h ( $\leq 0.02$  mbar) yielding a yellow solid.

**Molecular formula:** C<sub>24</sub>H<sub>40</sub>N<sub>4</sub>P<sub>2</sub>Se<sub>2</sub>

**Molecular weight:** 604.48 g mol<sup>-1</sup>

**Yield:** 0.049 g (0.08 mmol, 71 %)

**Melting point:** 120 °C (dec.)

**EA:** calculated (%) C 47.69 H 6.67 N 9.27

found (%) C 46.85 H 6.66 N 9.20

**MS (pos. ESI):**  $m/z$  (%) = 604.107 (4) [M]<sup>+</sup>, 527.197 (100) [M–Se+H]<sup>+</sup>, 499.165 (25) [M–C<sub>2</sub>H<sub>4</sub>–Se+H]<sup>+</sup>.

**HRMS (pos. ESI):**  $m/z$  calculated for [C<sub>24</sub>H<sub>40</sub>N<sub>4</sub>P<sub>2</sub>Se<sub>2</sub>]<sup>+</sup>: 604.107; found: 604.107.

$m/z$  calculated for [C<sub>24</sub>H<sub>40</sub>N<sub>4</sub>P<sub>2</sub>Se<sub>2</sub>H]<sup>+</sup>: 605.1146; found: 605.1145.

**IR (ATR):**  $\tilde{\nu}$  / cm<sup>-1</sup> = 2959 (m,  $\nu_{as}(\text{CH}_3)$ ,  $\nu_s(\text{CH}_2)$ ), 2933 (m,  $\nu_{as}(\text{CH}_3)$ ,  $\nu_s(\text{CH}_2)$ ), 2871 (m,  $\nu_s(\text{CH}_3)$ ,  $\nu_{as}(\text{CH}_2)$ ).

**<sup>1</sup>H NMR** (500.04 MHz, 298.0 K, CDCl<sub>3</sub>):  $\delta$  / ppm = 0.96 (t,  $^3J_{\text{H,H}} = 7.4$  Hz, 12H, CH<sub>3</sub>), 1.38 (qm,  $^3J_{\text{H,H}} = 7.4$  Hz, 8H, CH<sub>2</sub>CH<sub>3</sub>), 1.67–1.82 (m, 12H, PCH<sub>2</sub>, NCH<sub>2</sub>CH<sub>2</sub>), 4.20–4.37 (m, 8H, NCH<sub>2</sub>).

**<sup>13</sup>C{<sup>1</sup>H} NMR** (125.75 MHz, 298.0 K, CDCl<sub>3</sub>):  $\delta$  / ppm = 13.9 (s, CH<sub>3</sub>), 19.8 (dd,  $J_{\text{P,C}} = 4.6$  Hz, PCH<sub>2</sub>), 20.1 (m, CH<sub>2</sub>CH<sub>3</sub>), 32.0 (m, NCH<sub>2</sub>CH<sub>2</sub>), 48.9 (m, NCH<sub>2</sub>), 137.3 (dd,  $J_{\text{P,C}} = 4.6$  Hz, PC), 159.1 ( $s_{\text{sat}}$ ,  $^1J_{\text{Se,C}} = 233.4$  Hz, CSe).

**<sup>31</sup>P NMR** (202.44 MHz, 298.0 K, CDCl<sub>3</sub>):  $\delta$  / ppm = –94.7 (tm,  $^2J_{\text{P,H}} = 5.3$  Hz).

**<sup>31</sup>P{<sup>1</sup>H} NMR** (202.44 MHz, 298.0 K, CDCl<sub>3</sub>):  $\delta$  / ppm = –94.7 (s).

**<sup>77</sup>Se NMR** (57.24 MHz, 298.0 K, CDCl<sub>3</sub>):  $\delta$  / ppm = 26.4 (s).

### 2.2. Generation of 3

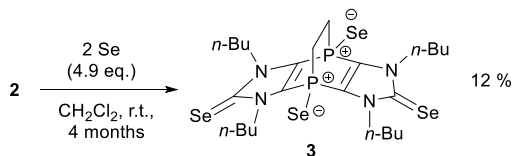

In a 20 mL Schlenk tube 0.139 g (0.21 mmol, 1.0 eq.) of **2** and 0.081 g (1.03 mmol, 4.9 eq.) grey selenium were suspended in 4 mL dichloromethane and stirred at ambient temperature while the reaction course was monitored via  $^{31}\text{P}\{^1\text{H}\}$  NMR spectroscopy. After 4 months no change in the composition of the reaction mixture was observed anymore and the contents were extracted with additional dichloromethane (twice 4 mL). The solvent was removed *in vacuo* ( $\leq 0.05$  mbar) yielding a yellow solid which was washed with twice 3 mL diethyl ether and three times 3 mL *n*-pentane. After drying for 2 h ( $\leq 0.02$  mbar) the product mixture was obtained as yellow solid and analysed by NMR spectroscopy.

**Molecular formula:**  $\text{C}_{24}\text{H}_{40}\text{N}_4\text{P}_2\text{Se}_2$

**Molecular weight:**  $762.44 \text{ g mol}^{-1}$

**Content in mixture:** 12 % ( $^{31}\text{P}$  NMR integration of isolated reaction mixture)

$^{31}\text{P}$  NMR (202.44 MHz, 298.0 K,  $\text{CD}_2\text{Cl}_2$ ):  $\delta / \text{ppm} = -22.1$  (br  $s_{\text{sat}}$ ,  $^1J_{\text{Se,P}} = 856 \text{ Hz}$ ,  $^3J_{\text{P,P}} = 49 \text{ Hz}$ ).

$^{31}\text{P}\{^1\text{H}\}$  NMR (202.44 MHz, 298.0 K,  $\text{CD}_2\text{Cl}_2$ ):  $\delta / \text{ppm} = -21.8$  (d,  $^1J_{\text{Se,P}} = 856 \text{ Hz}$ ).

$^{77}\text{Se}$  NMR (57.24 MHz, 298.0 K,  $\text{CD}_2\text{Cl}_2$ ):  $\delta / \text{ppm} = -438.2$  (d,  $^1J_{\text{Se,P}} = 856 \text{ Hz}$ , PSe), 43.6 (s, CSe).

### 2.3. Generation of **4**

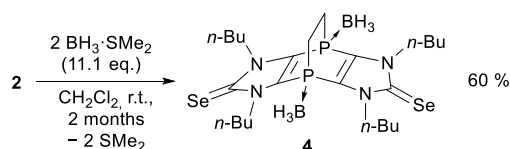

To a solution of 0.112 g (0.19 mmol, 1.0 eq.) of **2** in 3 mL dichloromethane in a 15 mL Schlenk tube 0.20 mL (2.11 mmol, 11.1 eq.)  $\text{BH}_3\cdot\text{SMe}_2$  were added and the reaction solution was stirred at ambient temperature while the reaction course was monitored via  $^{31}\text{P}\{^1\text{H}\}$  NMR spectroscopy. After 2 months no change in the composition of the reaction mixture was observed anymore and the solvent was removed *in vacuo* ( $\leq 0.05$  mbar). The resulting yellow residue was washed with three times 3 mL *n*-pentane and after drying for 2 h ( $\leq 0.02$  mbar) the product mixture was obtained as light yellow solid and analysed by NMR spectroscopy and SCXRD.

**Molecular formula:**  $\text{C}_{24}\text{H}_{46}\text{B}_2\text{N}_4\text{P}_2\text{Se}_2$

**Molecular weight:**  $632.17 \text{ g mol}^{-1}$

**Content in mixture:** 60 % ( $^{31}\text{P}$  NMR integration of isolated reaction mixture)

$^{31}\text{P}$  NMR (202.44 MHz, 298.0 K,  $\text{CD}_2\text{Cl}_2$ ):  $\delta / \text{ppm} = -17.8$  (br s).

$^{31}\text{P}\{^1\text{H}\}$  NMR (202.44 MHz, 298.0 K,  $\text{CD}_2\text{Cl}_2$ ):  $\delta / \text{ppm} = -17.8$  (s).

### 2.4. Synthesis of **5**

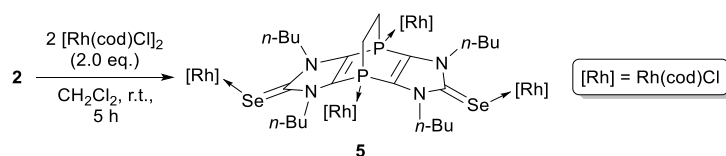

In a 20 mL Schlenk tube 0.120 g (0.20 mmol, 1.0 eq.) of **2** and 0.195 g (0.40 mmol, 2.0 eq.)  $[\text{Rh}(\text{cod})\text{Cl}]_2$  were dissolved in 6 mL dichloromethane and stirred for 5 h at ambient temperature. The solvent was

removed *in vacuo* ( $\leq 0.05$  mbar) and the resulting yellow solid was extracted with three times 2–5 mL toluene. After evaporation of the solvent the oily residue was washed with six times 4–5 mL diethyl ether, three times with 5 mL *n*-pentane, and then dried for 3 h ( $\leq 0.02$  mbar) yielding a yellow solid.

**Molecular formula:** C<sub>56</sub>H<sub>88</sub>Cl<sub>4</sub>N<sub>4</sub>P<sub>2</sub>Rh<sub>4</sub>Se<sub>2</sub>

**Molecular weight:** 1590.66 g mol<sup>-1</sup>

**Yield:** 0.229 g (0.14 mmol, 73 %)

**Melting point:** 231 °C (dec.)

|                           |         |        |        |
|---------------------------|---------|--------|--------|
| <b>EA:</b> calculated (%) | C 42.29 | H 5.58 | N 3.52 |
| found (%)                 | C 42.13 | H 5.77 | N 3.56 |

**MS (pos. ESI):**  $m/z$  (%) = 1555.009 (25) [M-Cl]<sup>+</sup>, 1309.041 (86) [M-[Rh(cod)Cl]-Cl]<sup>+</sup>, 1063.073 (66), [M-2[Rh(cod)Cl]-Cl]<sup>+</sup>.

**HRMS (pos. ESI):**  $m/z$  calculated for [C<sub>56</sub>H<sub>88</sub>Cl<sub>3</sub>N<sub>4</sub>P<sub>2</sub>Rh<sub>4</sub>Se<sub>2</sub>]<sup>+</sup>: 1555.0088; found: 1555.0093.

**IR (ATR):**  $\tilde{\nu}$  / cm<sup>-1</sup> = 2997 (m,  $\nu_{as}(\text{CH}_3)$ ,  $\nu_s(\text{CH}_2)$ ), 2956 (m,  $\nu_{as}(\text{CH}_3)$ ,  $\nu_s(\text{CH}_2)$ ), 2872 (m,  $\nu_s(\text{CH}_3)$ ,  $\nu_{as}(\text{CH}_2)$ ), 2830 (w,  $\nu_s(\text{CH}_3)$ ,  $\nu_{as}(\text{CH}_2)$ ).

**<sup>1</sup>H NMR** (500.04 MHz, 298.0 K, C<sub>6</sub>D<sub>6</sub>):  $\delta$  / ppm = 1.17 (t, <sup>3</sup>J<sub>H,H</sub> = 7.4 Hz, 12H, CH<sub>3</sub>), 1.45–1.57 (m, <sup>3</sup>J<sub>H,H</sub> = 7.4 Hz, 8H, CH<sub>2</sub>CH<sub>3</sub>), 1.58–1.62 (m, 4H, PCH<sub>2</sub>), 1.64–1.79 (m, 16H, CH<sub>2</sub>CH<sub>3</sub>, CH<sub>2</sub>CH), 2.05–2.15 (m, 4H, CH<sub>2</sub>CH), 2.15–2.35 (m, 16H, NCH<sub>2</sub>CH<sub>2</sub>, CH<sub>2</sub>CH), 2.46–2.59 (m, 4H, CH<sub>2</sub>CH), 3.94 (m, 4H, CH), 4.20 (m, 4H, CH), 4.82 (m, 4H, CH), 5.50 (td, <sup>3</sup>J<sub>H,H</sub> = 12.5 Hz, <sup>4</sup>J<sub>P,H</sub> = 5.1 Hz, 4H, NCH<sub>2</sub>), 5.83 (m, 4H, CH), 5.98–6.09 (m, 4H, NCH<sub>2</sub>).

**<sup>13</sup>C{<sup>1</sup>H} NMR** (125.75 MHz, 298.0 K, C<sub>6</sub>D<sub>6</sub>):  $\delta$  / ppm = 14.3 (s, CH<sub>3</sub>), 17.8 (dd, <sup>1</sup>J<sub>Rh,C</sub> = 19.3 Hz, <sup>2</sup>J<sub>P,C</sub> = 9.7 Hz, PCH<sub>2</sub>), 20.9 (br s, CH<sub>2</sub>CH<sub>3</sub>), 28.8 (s, CH<sub>2</sub>CH), 30.8 (s, CH<sub>2</sub>CH), 31.4 (m, NCH<sub>2</sub>CH<sub>2</sub>), 32.3 (s, CH<sub>2</sub>CH), 33.3 (m, CH<sub>2</sub>CH), 51.6 (br s, NCH<sub>2</sub>), 72.7–73.0 (m, CH), 83.1–83.3 (m, CH), 109.7–110.0 (m, CH), 132.3 (d, <sup>2</sup>J<sub>Rh,C</sub> = 58.2 Hz, PC), 158.6 (s<sub>sat</sub>, <sup>1</sup>J<sub>Se,C</sub> = 209 Hz, CSe).

**<sup>31</sup>P NMR** (202.44 MHz, 298.0 K, C<sub>6</sub>D<sub>6</sub>):  $\delta$  / ppm = -21.8 (dm, <sup>1</sup>J<sub>Rh,P</sub> = 166.7 Hz).

**<sup>31</sup>P{<sup>1</sup>H} NMR** (202.44 MHz, 298.0 K, C<sub>6</sub>D<sub>6</sub>):  $\delta$  / ppm = -21.8 (d, <sup>1</sup>J<sub>Rh,P</sub> = 166.7 Hz).

**<sup>77</sup>Se NMR** (57.24 MHz, 298.0 K, C<sub>6</sub>D<sub>6</sub>):  $\delta$  / ppm = 167.8 (d, <sup>1</sup>J<sub>Rh,Se</sub> = 21.4 Hz).

## 2.5. Methylation of 2

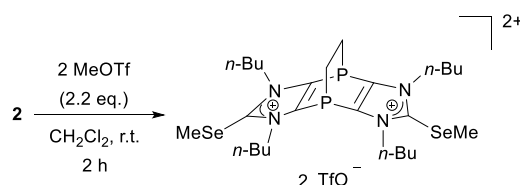

In a 20 mL Schlenk tube 0.11 mL (1.02 mmol, 2.2 eq.) MeOTf were added dropwise to a solution of 0.281 g (0.47 mmol, 1.0 eq.) of **2** in 5 mL dichloromethane. After stirring for 2 h at ambient temperature the former orange solution had turned light yellow and the solvent was removed *in vacuo* ( $\leq 0.05$  mbar). The resulting light yellow, oily residue was washed with twice 5 mL *n*-pentane and dried for 2 h ( $\leq 0.02$  mbar) yielding a colourless solid.

**Molecular formula:** C<sub>28</sub>H<sub>46</sub>F<sub>6</sub>N<sub>4</sub>O<sub>6</sub>P<sub>2</sub>S<sub>2</sub>Se<sub>2</sub>



**Molecular weight:** 932.70 g mol<sup>-1</sup>

**Yield:** 0.401 g (0.44 mmol, 95 %)

**Melting point:** 102 °C

**EA:** calculated (%) C 36.06 H 4.97 N 6.01 S 6.87

found (%) C 35.61 H 5.01 N 5.88 S 7.56

**MS (pos. ESI):**  $m/z$  (%) = 785.106 (100) [M-OTf]<sup>+</sup>, 318.077 (68) [M-2OTf]<sup>2+</sup>.

**HRMS (pos. ESI):**  $m/z$  calculated for [C<sub>27</sub>H<sub>46</sub>F<sub>3</sub>N<sub>4</sub>O<sub>3</sub>P<sub>2</sub>SSe<sub>2</sub>]<sup>+</sup>: 785.1045; found: 785.1041.

**IR (ATR):**  $\tilde{\nu}$  / cm<sup>-1</sup> = 2963 (m,  $\nu_{as}(\text{CH}_3)$ ,  $\nu_s(\text{CH}_2)$ ), 2938 (m,  $\nu_{as}(\text{CH}_3)$ ,  $\nu_s(\text{CH}_2)$ ), 2878 (m,  $\nu_s(\text{CH}_3)$ ,  $\nu_{as}(\text{CH}_2)$ ).

**<sup>1</sup>H NMR** (500.04 MHz, 298.0 K, CDCl<sub>3</sub>):  $\delta$  / ppm = 0.93–1.06 (m, 12H, CH<sub>3</sub>(*n*-Bu)), 1.40–1.52 (m, 8H, CH<sub>2</sub>CH<sub>3</sub>), 1.77–1.88 (m, 8H, CH<sub>2</sub>CH<sub>3</sub>), 2.13–2.18 (m, 4H, PCH<sub>2</sub>), 2.45–2.49 (m, 6H, SeCH<sub>3</sub>), 4.40–4.54 (m, 8H, NCH<sub>2</sub>).

**<sup>13</sup>C{<sup>1</sup>H} NMR** (125.75 MHz, 298.0 K, CDCl<sub>3</sub>):  $\delta$  / ppm = 11.2 ( $s_{\text{sat}}$ ,  $^1J_{\text{Se,C}} = 56.9$  Hz, SeCH<sub>3</sub>), 13.7 (s, CH<sub>3</sub>(*n*-Bu)), 18.8 (dd,  $J_{\text{P,C}} = 5.6$  Hz, PCH<sub>2</sub>), 20.3 (m, CH<sub>2</sub>CH<sub>3</sub>), 33.7 (m, NCH<sub>2</sub>CH<sub>2</sub>), 51.0 (m, NCH<sub>2</sub>), 120.9 (q,  $^1J_{\text{F,C}} = 322$  Hz, CF<sub>3</sub>), 138.2 ( $s_{\text{sat}}$ ,  $^1J_{\text{Se,C}} = 181$  Hz, CSeCH<sub>3</sub>), 143.2 (dd,  $J_{\text{P,C}} = 9.8$  Hz,  $J_{\text{P,C}} = 7.0$  Hz, PC).

**<sup>31</sup>P NMR** (202.44 MHz, 298.0 K, CDCl<sub>3</sub>):  $\delta$  / ppm = -94.5 (m).

**<sup>31</sup>P{<sup>1</sup>H} NMR** (202.44 MHz, 298.0 K, CDCl<sub>3</sub>):  $\delta$  / ppm = -94.5 (s).

**<sup>77</sup>Se NMR** (57.24 MHz, 298.0 K, CDCl<sub>3</sub>):  $\delta$  / ppm = 115.8 (s).

## 2.6. Synthesis of 6

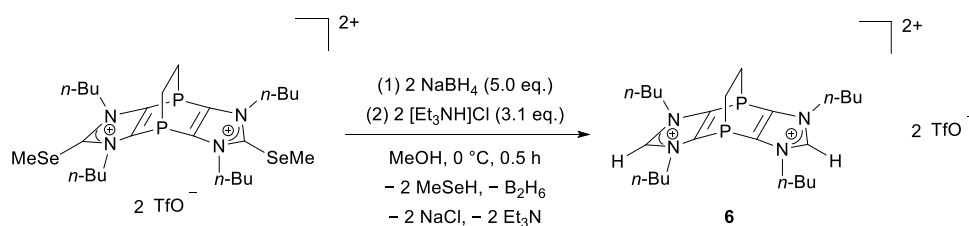

In a 50 mL Schlenk tube 0.315 g (8.10 mmol, 5.0 eq.) NaBH<sub>4</sub> were added to a solution of 1.511 g (1.62 mmol, 1.0 eq.) of the methylation product of **2** in 16 mL methanol at -20 °C which resulted in a darkening of the yellow solution and gas formation (MeSeH). After stirring for 20 min the gas evolution had stopped and 0.691 g (5.02 mmol, 3.1 eq.) [Et<sub>3</sub>NH]Cl were added. The suspension was let warm up to ambient temperature and the solvent was removed *in vacuo* ( $\leq 0.05$  mbar). The resulting yellow, oily residue was filtered over a bed of celite® and silica (d = 2 cm, h = 1 cm each) with 120 mL tetrahydrofuran. After solvent removal *in vacuo* ( $\leq 0.05$  mbar), extraction with three times 5–10 mL dichloromethane, followed by solvent evaporation, the light-yellow residue was washed with three times 10 mL *n*-pentane at -40 °C and dried for 3 h ( $\leq 0.02$  mbar) yielding a sticky, beige solid.

**Molecular formula:** C<sub>26</sub>H<sub>42</sub>F<sub>6</sub>N<sub>4</sub>O<sub>6</sub>P<sub>2</sub>S<sub>2</sub>

**Molecular weight:** 746.70 g mol<sup>-1</sup>

**Yield:** 0.805 g (1.08 mmol, 67 %)

**Melting point:** 121 °C

**MS (pos. ESI):**  $m/z$  (%) = 597.239 (100) [M-OTf]<sup>+</sup>, 210.128 (17) [M-2OTf-C<sub>2</sub>H<sub>4</sub>]<sup>2+</sup>,

**HRMS (pos. ESI):**  $m/z$  calculated for [C<sub>27</sub>H<sub>46</sub>F<sub>3</sub>N<sub>4</sub>O<sub>3</sub>P<sub>2</sub>S]<sup>+</sup>: 597.2399; found: 597.2396.

**IR (ATR):**  $\tilde{\nu}$  / cm<sup>-1</sup> = 3110 (w,  $\nu$ (CH)), 3040 (w,  $\nu$ (CH)), 2966 (w,  $\nu_{as}$ (CH<sub>3</sub>),  $\nu_s$ (CH<sub>2</sub>)), 2936 (w,  $\nu_{as}$ (CH<sub>3</sub>),  $\nu_s$ (CH<sub>2</sub>)).

**<sup>1</sup>H NMR** (500.04 MHz, 298.0 K, CD<sub>2</sub>Cl<sub>2</sub>):  $\delta$  / ppm = 0.97 (t, <sup>3</sup>J<sub>H,H</sub> = 7.4 Hz, 12H, CH<sub>3</sub>), 1.35–1.44 (m, 8H, CH<sub>2</sub>CH<sub>3</sub>), 1.87 (tt, <sup>3</sup>J<sub>H,H</sub> = 8.8 Hz, <sup>3</sup>J<sub>H,H</sub> = 6.8 Hz, 8H, CH<sub>2</sub>CH<sub>3</sub>), 2.10 (t, J<sub>P,H</sub> = 5.4 Hz, 4H, PCH<sub>2</sub>), 4.33 (t, <sup>3</sup>J<sub>H,H</sub> = 7.5 Hz, 8H, NCH<sub>2</sub>), 8.93 (t, <sup>4</sup>J<sub>P,H</sub> = 3.0 Hz, CH).

**<sup>13</sup>C{<sup>1</sup>H} NMR** (125.75 MHz, 298.0 K, CD<sub>2</sub>Cl<sub>2</sub>):  $\delta$  / ppm = 13.4 (s, CH<sub>3</sub>), 18.8 (dd, J<sub>P,C</sub> = 5.6 Hz, PCH<sub>2</sub>), 20.0 (m, CH<sub>2</sub>CH<sub>3</sub>), 33.0 (m, NCH<sub>2</sub>CH<sub>2</sub>), 49.9 (m, NCH<sub>2</sub>), 121.0 (q, <sup>1</sup>J<sub>F,C</sub> = 320.5 Hz, CF<sub>3</sub>), 138.8 (s, CH), 141.9 (dd, J<sub>P,C</sub> = 9.5 Hz, J<sub>P,C</sub> = 7.0 Hz, PC).

**<sup>31</sup>P NMR** (202.44 MHz, 298.0 K, CD<sub>2</sub>Cl<sub>2</sub>):  $\delta$  / ppm = -97.4 (m).

**<sup>31</sup>P{<sup>1</sup>H} NMR** (202.44 MHz, 298.0 K, CD<sub>2</sub>Cl<sub>2</sub>):  $\delta$  / ppm = -97.4 (s).

## 2.7. Synthesis of 7

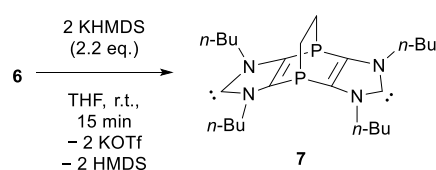

In a 50 mL Schlenk tube 0.397 g (1.99 mmol, 2.2 eq.) KHMDS in 5 mL THF were added to a suspension of 0.675 g (0.90 mmol, 1.0 eq.) of **6** in 15 mL THF via a transfer canula, resulting in an orange, slightly turbid solution. After stirring for 15 min at ambient temperature the solvent was removed *in vacuo* ( $\leq 0.05$  mbar) at the same temperature. The resulting yellow solid mixed with an orange, oily residue was extracted with three times 5–7 mL toluene. After removal of the solvent *in vacuo* ( $\leq 0.05$  mbar) at ambient temperature, washing with twice 10 mL *n*-pentane and drying for 4 h ( $\leq 0.02$  mbar) a beige solid was obtained.

**Molecular formula:** C<sub>24</sub>H<sub>40</sub>N<sub>4</sub>P<sub>2</sub>

**Molecular weight:** 446.56 g mol<sup>-1</sup>

**Yield:** 0.141 g (0.32 mmol, 36 %)

**Melting point:** 104 °C (dec.)

|                           |         |        |         |
|---------------------------|---------|--------|---------|
| <b>EA:</b> calculated (%) | C 64.55 | H 9.03 | N 12.55 |
| found (%)                 | C 63.44 | H 8.96 | N 12.37 |

**MS (pos. APCI):**  $m/z$  (%) = 483.300 (100) [M+2H<sub>2</sub>O+H]<sup>+</sup>, 465.289 (31) [M+H<sub>2</sub>O+H]<sup>+</sup>.

**HRMS (pos. APCI):**  $m/z$  calculated for [C<sub>24</sub>H<sub>43</sub>N<sub>4</sub>P<sub>2</sub>O]<sup>+</sup>: 465.2907; found: 465.2897.

**IR (ATR):**  $\tilde{\nu}$  / cm<sup>-1</sup> = 2957 (w,  $\nu_{as}$ (CH<sub>3</sub>),  $\nu_s$ (CH<sub>2</sub>)), 2931 (w,  $\nu_{as}$ (CH<sub>3</sub>),  $\nu_s$ (CH<sub>2</sub>)), 2871 (m,  $\nu_s$ (CH<sub>3</sub>),  $\nu_{as}$ (CH<sub>2</sub>)).

**<sup>1</sup>H NMR** (500.04 MHz, 298.0 K, THF-d<sub>8</sub>):  $\delta$  / ppm = 0.93 (t, <sup>3</sup>J<sub>H,H</sub> = 7.4 Hz, 12H, CH<sub>3</sub>), 1.27–1.38 (m, 8H, CH<sub>2</sub>CH<sub>3</sub>), 1.60 (t, J<sub>P,H</sub> = 5.3 Hz, 4H, PCH<sub>2</sub>), 1.70–1.82 (m, 8H, NCH<sub>2</sub>CH<sub>2</sub>), 4.03–4.15 (m, 8H, NCH<sub>2</sub>).

$^{13}\text{C}\{^1\text{H}\}$  NMR (125.75 MHz, 298.0 K, THF- $d_8$ ):  $\delta$  / ppm = 14.3 (s,  $\text{CH}_3$ ), 19.8 (dd,  $J_{\text{P,C}} = 6.4$  Hz,  $\text{PCH}_2$ ), 20.8 (m,  $\text{CH}_2\text{CH}_3$ ), 35.7 (m,  $\text{NCH}_2\text{CH}_2$ ), 50.1 (m,  $\text{NCH}_2$ ), 140.4 (dd,  $J_{\text{P,C}} = 6.1$  Hz,  $J_{\text{P,C}} = 4.1$  Hz,  $\text{PC}$ ), 220.0 (br s,  $\text{C}^2$ ).

$^{31}\text{P}$  NMR (202.44 MHz, 298.0 K, THF- $d_8$ ):  $\delta$  / ppm = -94.8 (m).

$^{31}\text{P}\{^1\text{H}\}$  NMR (202.44 MHz, 298.0 K, THF- $d_8$ ):  $\delta$  / ppm = -94.8 (s).

## 2.8. Generation of 8

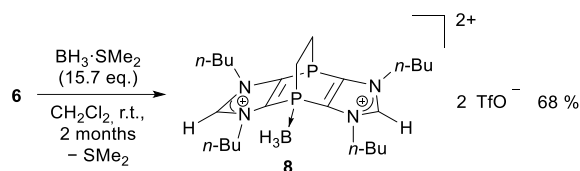

In a 20 mL Schlenk tube 0.20 mL (2.11 mmol, 15.7 eq.)  $\text{BH}_3\cdot\text{SMe}_2$  were added to a solution of 0.100 g (0.13 mmol, 1.0 eq.) of **6** in 2.5 mL dichloromethane and the reaction solution was stirred at ambient temperature while the reaction course was monitored via  $^{31}\text{P}\{^1\text{H}\}$  NMR spectroscopy. After 2 months no change in the composition of the reaction mixture was observed anymore and the solvent was removed *in vacuo* ( $\leq 0.05$  mbar). The resulting colourless residue was washed with three times 3 mL *n*-pentane and after drying for 2 h ( $\leq 0.02$  mbar) the product mixture was obtained as slightly sticky, colourless solid and analysed by NMR spectroscopy and SCXRD.

**Molecular formula:**  $\text{C}_{26}\text{H}_{45}\text{BF}_6\text{N}_4\text{O}_6\text{P}_2\text{S}_2$

**Molecular weight:**  $760.54 \text{ g mol}^{-1}$

**Content in mixture:** 68 % ( $^{31}\text{P}$  NMR integration of isolated reaction mixture)

$^{31}\text{P}$  NMR (202.50 MHz, 298.0 K,  $\text{CD}_2\text{Cl}_2$ ):  $\delta$  / ppm = -98.1 (br s), -13.3 (br s).

$^{31}\text{P}\{^1\text{H}\}$  NMR (202.50 MHz, 298.0 K,  $\text{CD}_2\text{Cl}_2$ ):  $\delta$  / ppm = -98.1 (d,  $^3J_{\text{P,P}} = 5.8$  Hz), -13.3 (br s).

## 2.9. Synthesis of 9

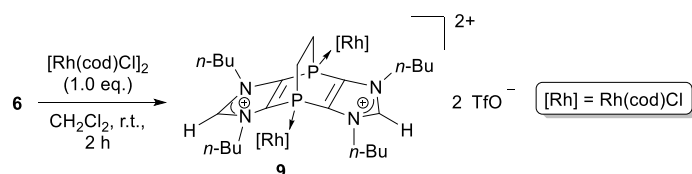

In a 20 mL Schlenk tube 0.079 g (0.11 mmol, 1.0 eq.) of **6** and 0.052 g (0.11 mmol, 1.0 eq.)  $[\text{Rh}(\text{cod})\text{Cl}]_2$  were dissolved in 4 mL dichloromethane and stirred for 2 h at ambient temperature yielding a yellow suspension. The solvent was removed *in vacuo* ( $\leq 0.05$  mbar) and the resulting yellow solid was washed with three times a mixture of 2 mL toluene / and 2 mL *n*-pentane each, twice 2 mL diethyl ether and three times 3–4 mL *n*-pentane and dried for 2 h ( $\leq 0.02$  mbar) yielding a yellow solid.

**Molecular formula:**  $\text{C}_{42}\text{H}_{66}\text{Cl}_2\text{F}_6\text{N}_4\text{O}_6\text{P}_2\text{Rh}_2\text{S}_2$

**Molecular weight:**  $1239.78 \text{ g mol}^{-1}$

**Yield:** 0.092 g (0.07 mmol, 67 %)

**Melting point:**  $> 250$  °C

|                           |         |        |        |        |
|---------------------------|---------|--------|--------|--------|
| <b>EA:</b> calculated (%) | C 40.69 | H 5.37 | N 4.52 | S 5.17 |
| found (%)                 | C 40.76 | H 5.37 | N 4.37 | S 5.32 |

**MS (pos. ESI):**  $m/z$  (%) = 1089.1775 (4)  $[M-OTf]^+$ , 843.2086 (21)  $[M-[Rh(cod)Cl]-OTf]^+$ , 597.2401 (100)  $[M-2[Rh(cod)Cl]-OTf]^+$ .

**MS (neg. ESI):**  $m/z$  (%) = 149.1 (100)  $[OTf]^-$ .

**HRMS (pos. ESI):**  $m/z$  calculated for  $[C_{41}H_{66}Cl_2F_3N_4O_3P_2Rh_2S]^+$ : 1089.1765; found: 1089.1775.

**IR (ATR):**  $\tilde{\nu}$  /  $cm^{-1}$  = 3112 (w,  $\nu(CH)$ ), 3042 (w,  $\nu(CH)$ ), 2964 (m,  $\nu_{as}(CH_3)$ ,  $\nu_s(CH_2)$ ), 2878 (m,  $\nu_s(CH_3)$ ).

**$^1H$  NMR** (499.96 MHz, 298.0 K,  $CD_2Cl_2$ ):  $\delta$  / ppm = 1.09 (t,  $^3J_{H,H} = 7.4$  Hz, 12H,  $CH_3$ ), 1.57–1.67 (m, 8H,  $CH_2CH_3$ ), 2.05–2.16 (m, 12H,  $NCH_2CH_2$ ,  $PCH_2$ ), 2.30–2.39 (m, 8H,  $CH_2CH$ ), 2.42–2.52 (m, 4H,  $CH_2CH$ ), 2.53–2.63 (m, 4H,  $CH_2CH$ ), 4.30–4.36 (m, 4H,  $CH_2CH$ ), 4.93–5.01 (m, 4H,  $NCH_2$ ), 5.61–5.69 (m, 4H,  $NCH_2$ ), 5.84–5.89 (m, 4H,  $CH_2CH$ ), 8.55 (t,  $^4J_{P,H} = 3.3$  Hz, 2H,  $CH$ ).

**$^{13}C\{^1H\}$  NMR** (125.73 MHz, 298.0 K,  $CD_2Cl_2$ ):  $\delta$  / ppm = 13.9 (s,  $CH_3$ ), 17.8 (dd,  $^1J_{Rh,C} = 20.3$  Hz,  $^2J_{P,C} = 9.9$  Hz,  $PCH_2$ ), 20.5 (s,  $CH_2CH_3$ ), 29.2 (s,  $CH_2CH$ ), 32.1 (m,  $NCH_2CH_2$ ), 33.3 (m,  $CH_2CH$ ), 51.6 (d,  $^3J_{P,C} = 2.8$  Hz,  $NCH_2$ ), 74.5–74.7 (m,  $CH_2CH$ ), 112.6–112.8 (m,  $CH_2CH$ ), 121.0 (q,  $^1J_{F,C} = 320.8$  Hz,  $CF_3$ ), 134.8 (d,  $^2J_{Rh,C} = 55.0$  Hz,  $PC$ ), 140.1 (t,  $^3J_{P,C} = 3.5$  Hz,  $CH$ ).

**$^{31}P$  NMR** (202.41 MHz, 298.0 K,  $CD_2Cl_2$ ):  $\delta$  / ppm = -24.7 (br d,  $^1J_{Rh,P} = 167.8$  Hz).

**$^{31}P\{^1H\}$  NMR** (202.41 MHz, 298.0 K,  $CD_2Cl_2$ ):  $\delta$  / ppm = -24.7 (dd,  $^1J_{Rh,P} = 172$  Hz,  $^4J_{Rh,P} = 3$  Hz), -24.7 (dd,  $^1J_{Rh,P} = 163$  Hz,  $^4J_{Rh,P} = 4$  Hz).

## 2.10. Generation of 10

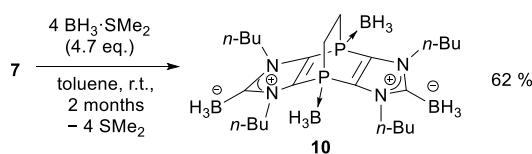

In a 15 mL Schlenk tube 0.05 mL (0.53 mmol, 4.7 eq.)  $BH_3 \cdot SMe_2$  were added to a solution of 0.050 g (0.11 mmol, 1.0 eq.) of **7** in 1.5 mL toluene and the reaction solution was stirred at ambient temperature while the reaction course was monitored via  $^{31}P\{^1H\}$  NMR spectroscopy. After 2 months no change in the composition of the reaction mixture was observed anymore and the solvent was removed *in vacuo* ( $\leq 0.05$  mbar). The resulting colourless residue was washed with three times 3 mL *n*-pentane and after drying for 4 h ( $\leq 0.02$  mbar) the product mixture was obtained as colourless solid and analysed by NMR spectroscopy and SCXRD.

**Molecular formula:**  $C_{24}H_{52}B_4N_4P_2$

**Molecular weight:** 501.90  $g\ mol^{-1}$

**Content in mixture:** 62 % ( $^{31}P$  NMR integration of isolated reaction mixture)

**$^{31}P$  NMR** (202.50 MHz, 298.0 K,  $CD_2Cl_2$ ):  $\delta$  / ppm = -17.7 (br s).

**$^{31}P\{^1H\}$  NMR** (202.50 MHz, 298.0 K,  $CD_2Cl_2$ ):  $\delta$  / ppm = -17.7 (s).

## 2.11. Synthesis of 11

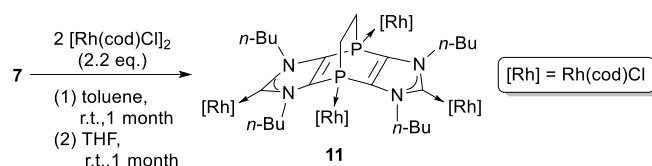

In a 20 mL Schlenk tube 0.050 g (0.11 mmol, 1.0 eq.) of **7** and 0.121 g (0.25 mmol, 2.2 eq.)  $[\text{Rh}(\text{cod})\text{Cl}]_2$  were dissolved in 3 mL toluene and stirred for 1 month at ambient temperature yielding an orange suspension. The solvent was evaporated *in vacuo* ( $\leq 0.05$  mbar) and the solids were redissolved in 5 mL THF and stirred for 1 month. After removal of the solvent *in vacuo* ( $\leq 0.05$  mbar) the yellow-brown residue was washed with eight times 5 mL *n*-pentane. After drying for 3 h ( $\leq 0.02$  mbar) a yellow-brown solid was obtained.

**Molecular formula:**  $\text{C}_{56}\text{H}_{88}\text{Cl}_4\text{N}_4\text{P}_2\text{Rh}_4$

**Molecular weight:**  $1432.72 \text{ g mol}^{-1}$

**Yield:** *not determined due to remaining impurities*

**Melting point:** *not determined due to remaining impurities*

**MS (pos. ESI):**  $m/z$  (%) = 693.2484 (100)  $[\text{M}-3(\text{Rh}(\text{cod})\text{Cl})+\text{H}]^+$ , 939.2165 (72)  $[\text{M}-2(\text{Rh}(\text{cod})\text{Cl})+\text{H}]^+$ :

**HRMS (pos. ESI):**  $m/z$  calculated  $[\text{C}_{56}\text{H}_{88}\text{Cl}_4\text{N}_4\text{P}_2\text{Rh}_4\text{H}]^+$ : 1433.1510; found: 1433.1508.

**IR (ATR):**  $\tilde{\nu} / \text{cm}^{-1}$  = 2982 (w,  $\nu_{\text{as}}(\text{CH}_3)$ ,  $\nu_s(\text{CH}_2)$ ,  $\nu(\text{CH})$ ), 2964 (w,  $\nu_{\text{as}}(\text{CH}_3)$ ,  $\nu_s(\text{CH}_2)$ ), 2871 (w,  $\nu_s(\text{CH}_3)$ ).

**$^1\text{H}$  NMR** (500.18 MHz, 298.0 K,  $\text{CD}_2\text{Cl}_2$ ):  $\delta / \text{ppm}$  = 1.19 (t,  $^3J_{\text{H,H}} = 7.2$  Hz, 12H,  $\text{CH}_3$ ), 1.62–1.74 (m, 8H,  $\text{CH}_2\text{CH}_3$ ), 1.49–1.58 (m, 4H,  $\text{PCH}_2$ ), 1.85–1.99 (m, 16H,  $\text{CH}_2\text{CH}$ ), 2.19–3.30 (m, 8H,  $\text{CH}_2\text{CH}$ ), 2.39 (m, 12H,  $\text{NCH}_2\text{CH}_2$ ), 2.49 (m, 4H,  $\text{CH}_2\text{CH}$ ), 2.62 (m, 4H,  $\text{CH}_2\text{CH}$ ), 3.11–3.20 (m, 4H,  $\text{CH}_2\text{CH}$ ), 3.92–4.02 (m, 4H,  $\text{CH}_2\text{CH}$ ), 4.87–5.05 (m, 4H,  $\text{CH}_2\text{CH}$ ), 5.33–5.43 (m, 4H,  $\text{NCH}_2$ ), 5.68–5.79 (m, 4H,  $\text{NCH}_2$ ), 5.80–5.91 (m, 4H,  $\text{CH}_2\text{CH}$ ).

**$^{13}\text{C}\{^1\text{H}\}$  NMR** (125.78 MHz, 298.0 K,  $\text{CD}_2\text{Cl}_2$ ):  $\delta / \text{ppm}$  = 14.2 (s,  $\text{CH}_3$ ), 18.0 (dd,  $^1J_{\text{Rh,C}} = 23.1$  Hz,  $^2J_{\text{P,C}} = 8.8$  Hz,  $\text{PCH}_2$ ), 21.2 (s,  $\text{CH}_2\text{CH}_3$ ), 28.9 (s,  $\text{CH}_2\text{CH}$ ), 29.2 (s,  $\text{CH}_2\text{CH}$ ), 33.5 (m,  $\text{NCH}_2\text{CH}_2$ ), 33.1 (m,  $\text{CH}_2\text{CH}$ ), 34.0 (m,  $\text{CH}_2\text{CH}$ ), 52.1 (m,  $\text{NCH}_2$ ), 70.2 (m,  $\text{CH}_2\text{CH}$ ), 72.7 (m,  $\text{CH}_2\text{CH}$ ), 98.3 (m,  $\text{CH}_2\text{CH}$ ), 111.0 (m,  $\text{CH}_2\text{CH}$ , 2<sup>nd</sup> isomer), 110.2 (m,  $\text{CH}_2\text{CH}$ , 1<sup>st</sup> isomer), 134.2 (dd,  $J_{\text{Rh,C}} = 53.0$  Hz,  $J_{\text{P,C}} = 3.2$  Hz,  $\text{PC}$ ), 191.7 (t,  $^1J_{\text{Rh,P}} = 52.4$  Hz,  $\text{CRh}$ ).

**$^{31}\text{P}$  NMR** (202.50 MHz, 298.0 K,  $\text{CD}_2\text{Cl}_2$ ):  $\delta / \text{ppm}$  = -33.8 (d,  $^1J_{\text{Rh,P}} = 160.8$  Hz, 1<sup>st</sup> isomer), -29.5 (d,  $^1J_{\text{Rh,P}} = 163.5$  Hz, 2<sup>nd</sup> isomer)(ratio 2.8:1).

**$^{31}\text{P}\{^1\text{H}\}$  NMR** (202.50 MHz, 298.0 K,  $\text{CD}_2\text{Cl}_2$ ):  $\delta / \text{ppm}$  = -33.8 (d,  $^1J_{\text{Rh,P}} = 160.8$  Hz, 1<sup>st</sup> isomer), -29.5 (d,  $^1J_{\text{Rh,P}} = 163.7$  Hz, 2<sup>nd</sup> isomer)(ratio 2.9:1).

### 3. NMR spectra

Impurities (solvent peaks, grease peaks) are marked with \* in the spectra.

#### 3.1. 2

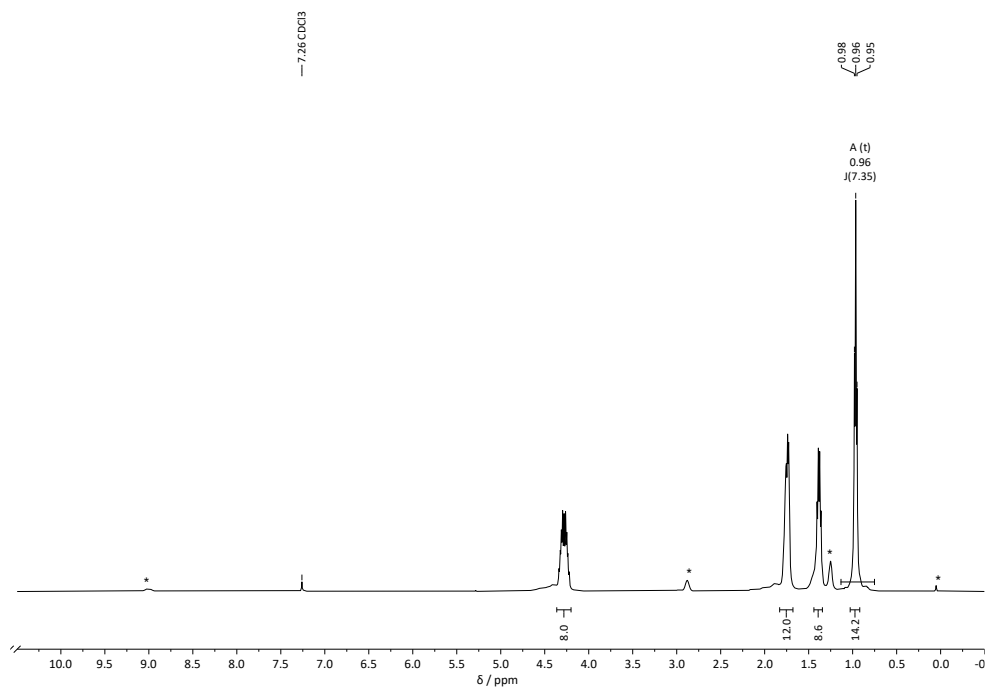

Figure S1 <sup>1</sup>H NMR spectrum (CDCl<sub>3</sub>, 499.96 Hz, 298.0 K) of **2**.

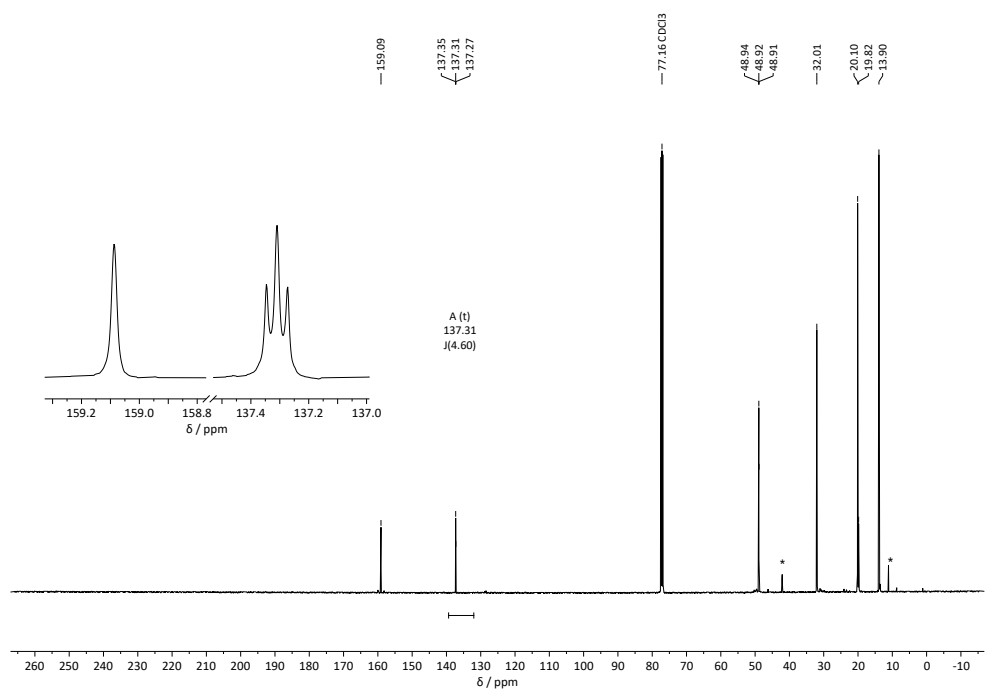

Figure S2 <sup>13</sup>C{<sup>1</sup>H} NMR spectrum (CDCl<sub>3</sub>, 125.73 Hz, 298.0 K) of **2**.

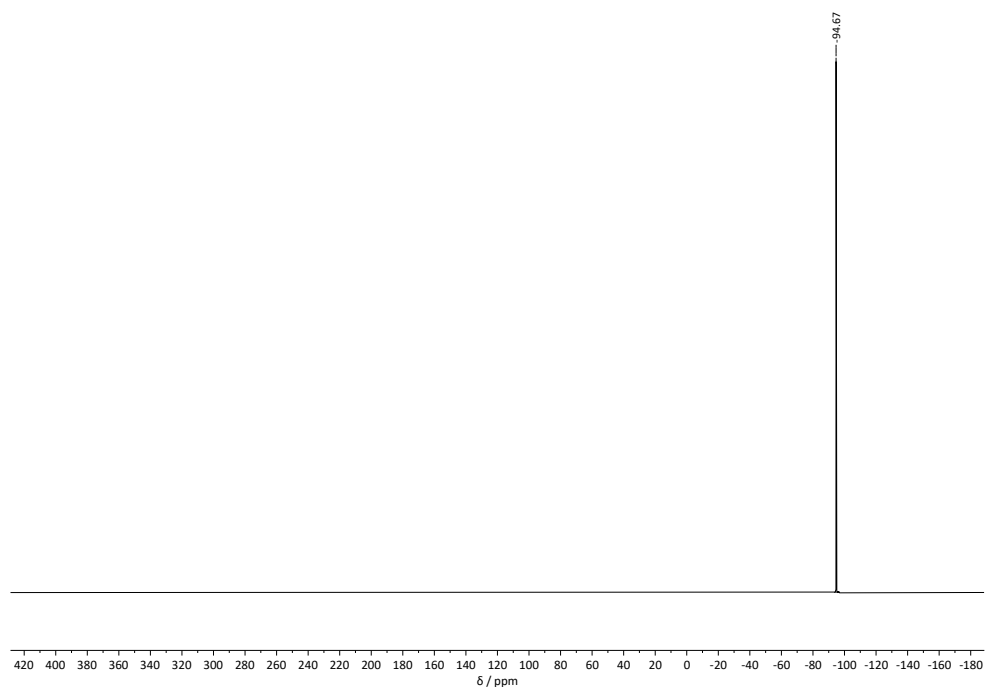

**Figure S3**  $^{31}\text{P}\{^1\text{H}\}$  NMR spectrum ( $\text{CDCl}_3$ , 202.41 Hz, 298.0 K) of **2**.

### 3.2. **3** in reaction mixture

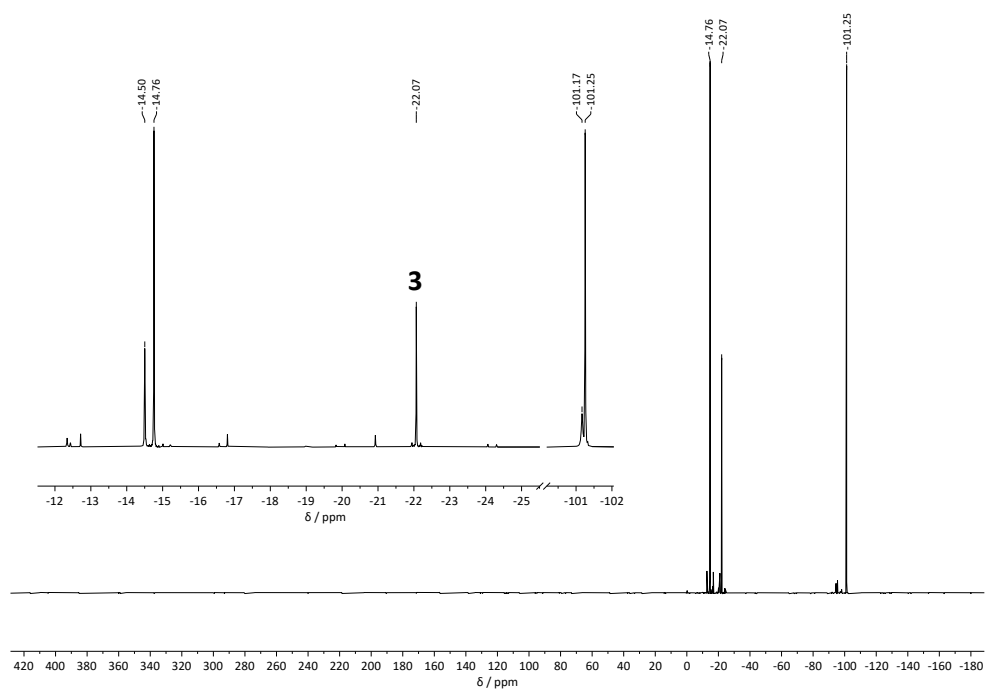

**Figure S4**  $^{31}\text{P}\{^1\text{H}\}$  NMR spectrum ( $\text{CD}_2\text{Cl}_2$ , 202.50 Hz, 298.0 K) of **3** in reaction mixture.

### 3.3. 4 in reaction mixture

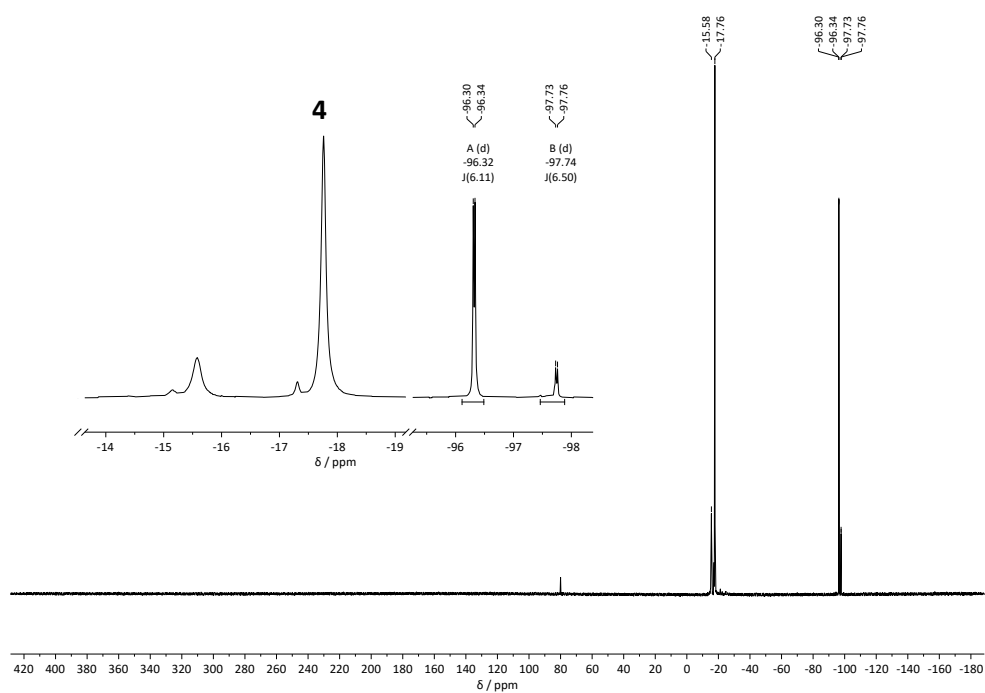

Figure S5  $^{31}\text{P}\{^1\text{H}\}$  NMR spectrum ( $\text{CD}_2\text{Cl}_2$ , 202.50 Hz, 298.0 K) of **4** in reaction mixture.

### 3.4. 5

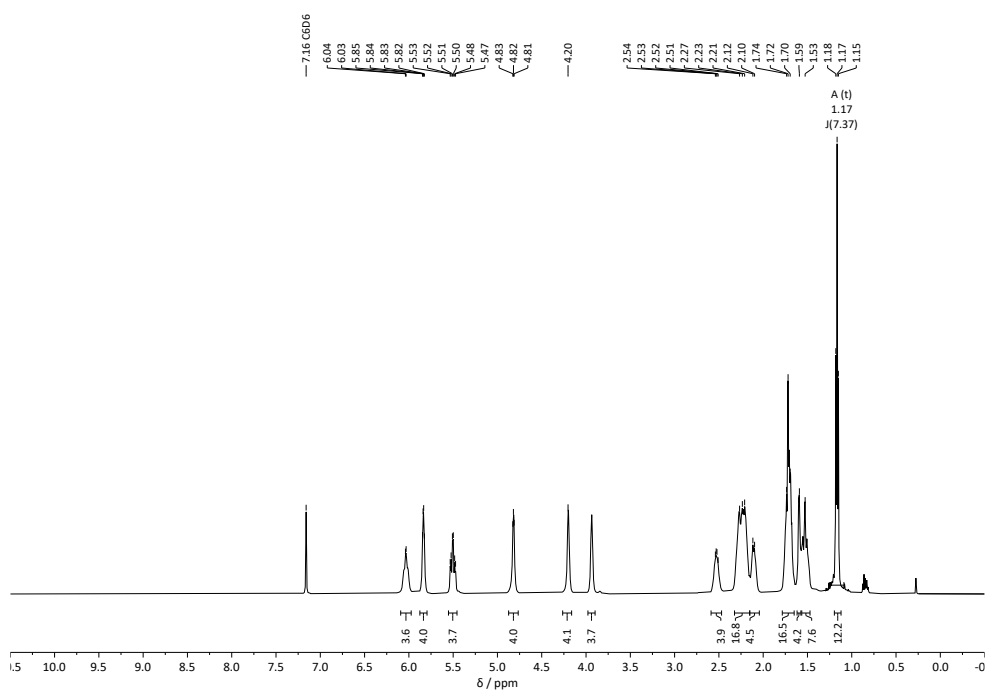

Figure S6  $^1\text{H}$  NMR spectrum ( $\text{C}_6\text{D}_6$ , 499.96 Hz, 298.0 K) of **5**.



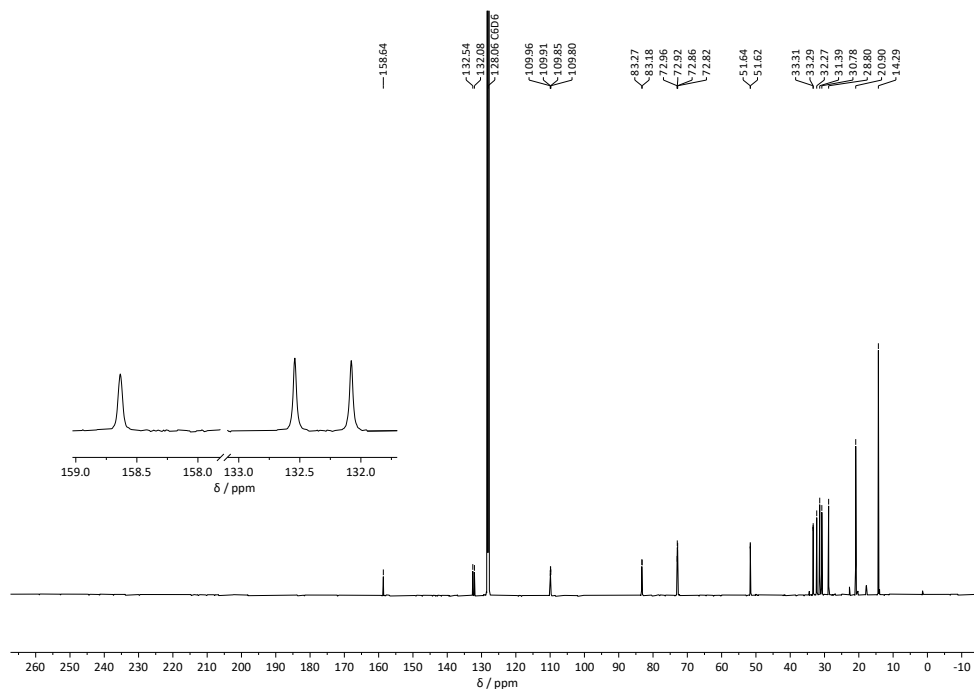

**Figure S7**  $^{13}\text{C}\{^1\text{H}\}$  NMR spectrum ( $\text{C}_6\text{D}_6$ , 125.73 Hz, 298.0 K) of **5**.

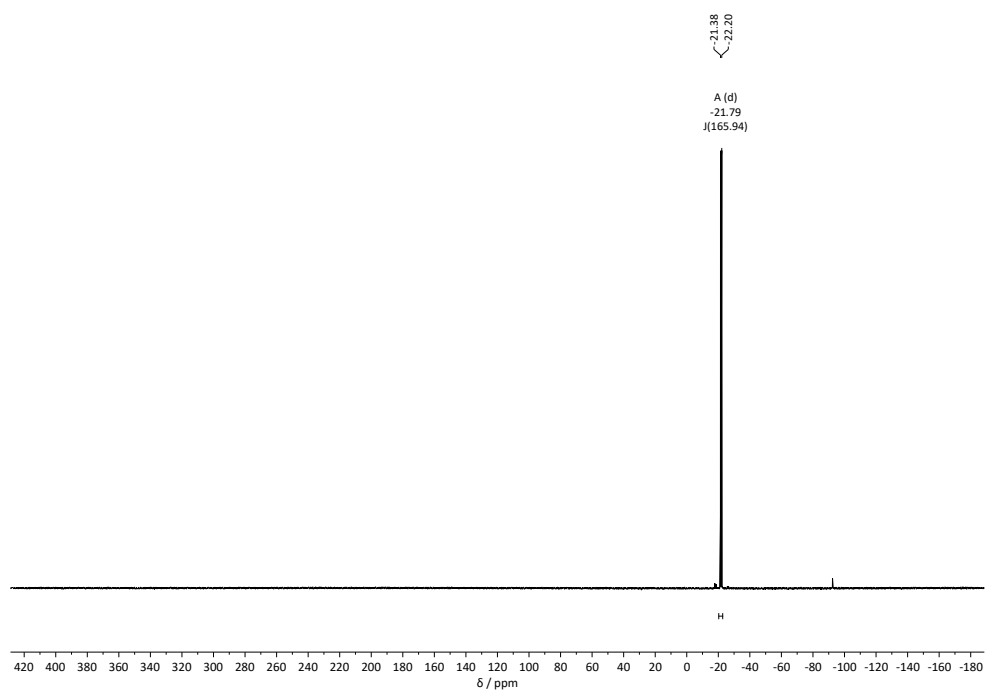

**Figure S8**  $^{31}\text{P}\{^1\text{H}\}$  NMR spectrum ( $\text{C}_6\text{D}_6$ , 202.41 Hz, 298.0 K) of **5**.

### 3.5. Methylation product of 2

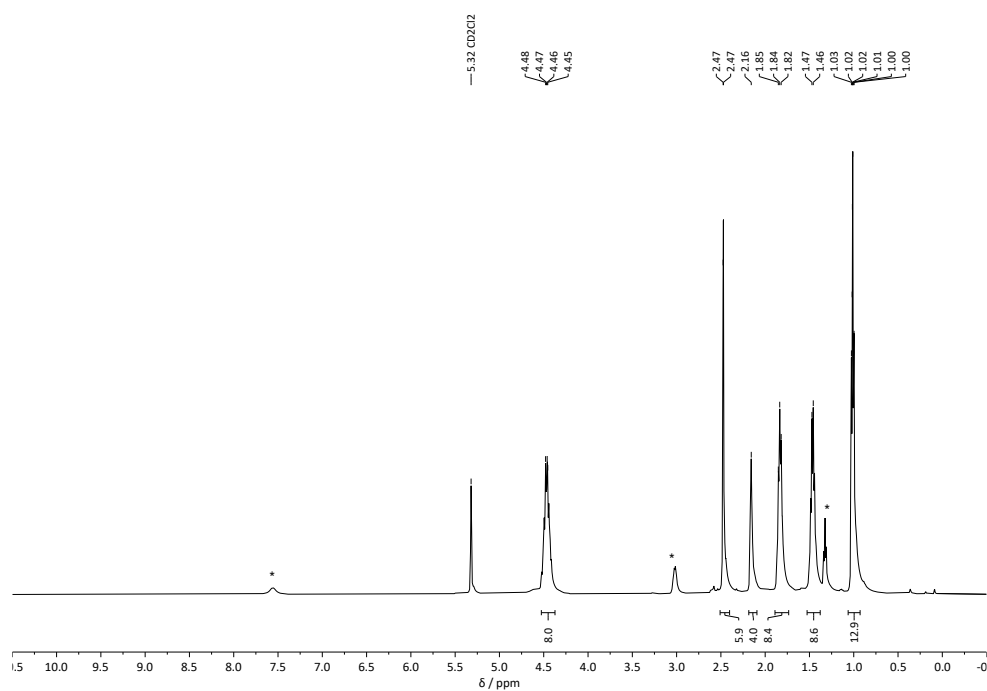

Figure 9  $^1\text{H}$  NMR spectrum ( $\text{CD}_2\text{Cl}_2$ , 499.96 Hz, 298.0 K) of the methylation product of 2.

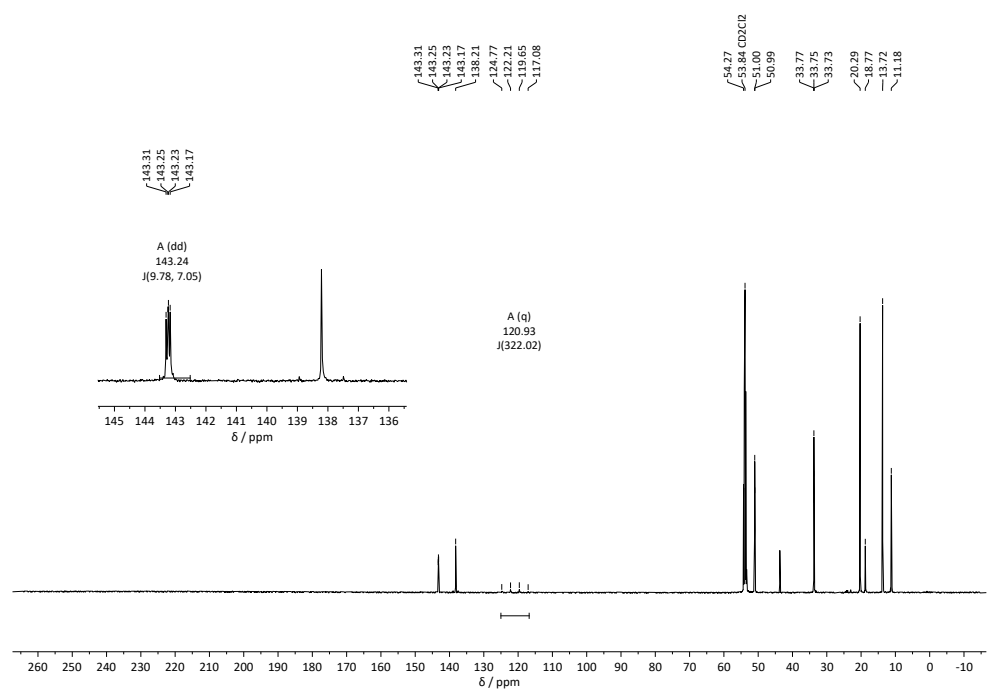

Figure S10  $^{13}\text{C}\{^1\text{H}\}$  NMR spectrum ( $\text{CD}_2\text{Cl}_2$ , 125.75 Hz, 298.0 K) of 4a.

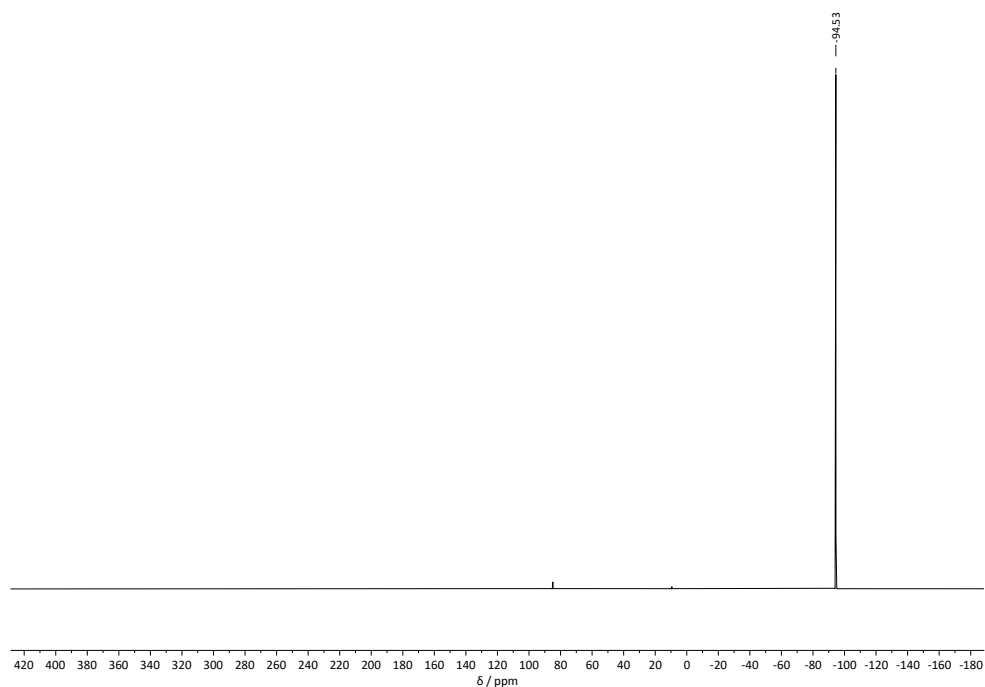

**Figure S11**  $^{31}\text{P}\{^1\text{H}\}$  NMR spectrum ( $\text{CD}_2\text{Cl}_2$ , 202.41 Hz, 298.0 K) of the methylation product of **2**.

### 3.6. 6

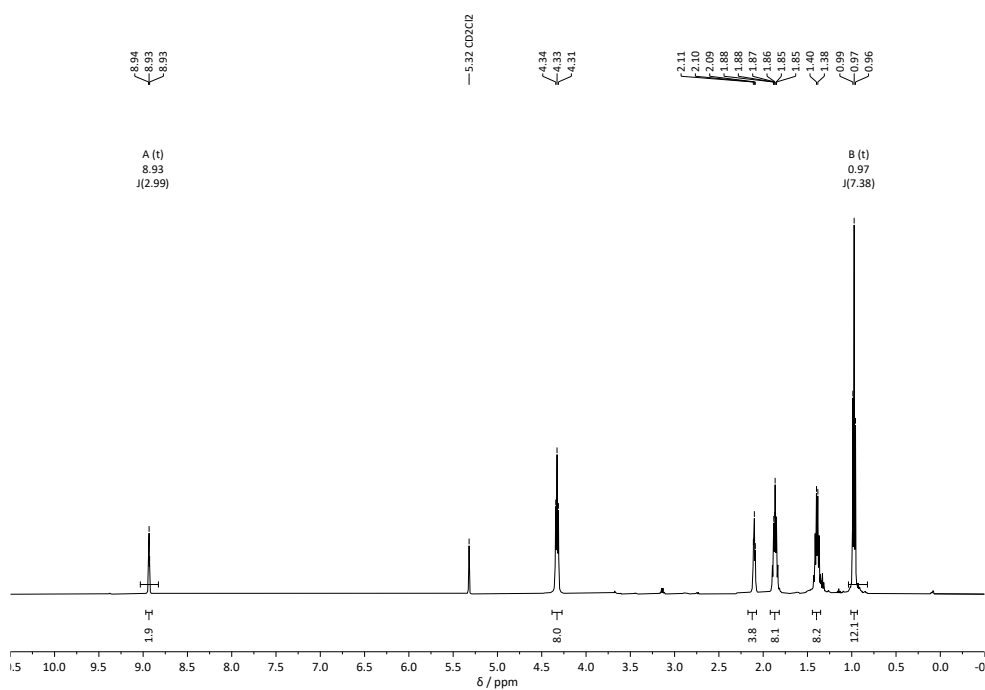

**Figure S12**  $^1\text{H}$  NMR spectrum ( $\text{CD}_2\text{Cl}_2$ , 500.04 Hz, 298.0 K) of **6**.

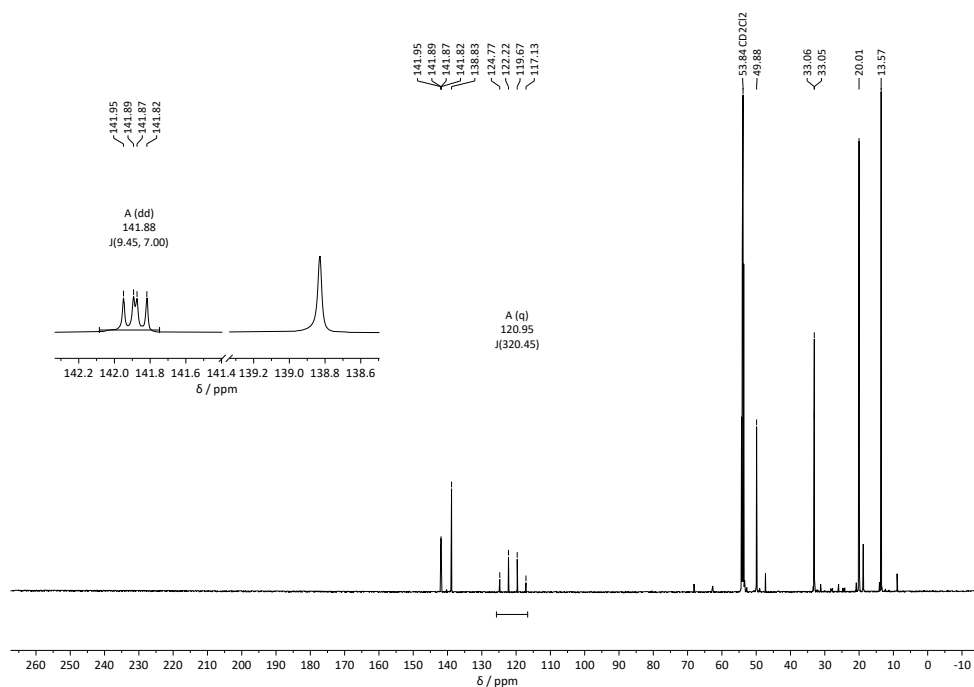

**Figure S13**  $^{13}\text{C}\{^1\text{H}\}$  NMR spectrum ( $\text{CD}_2\text{Cl}_2$ , 125.75 Hz, 298.0 K) of **6**.

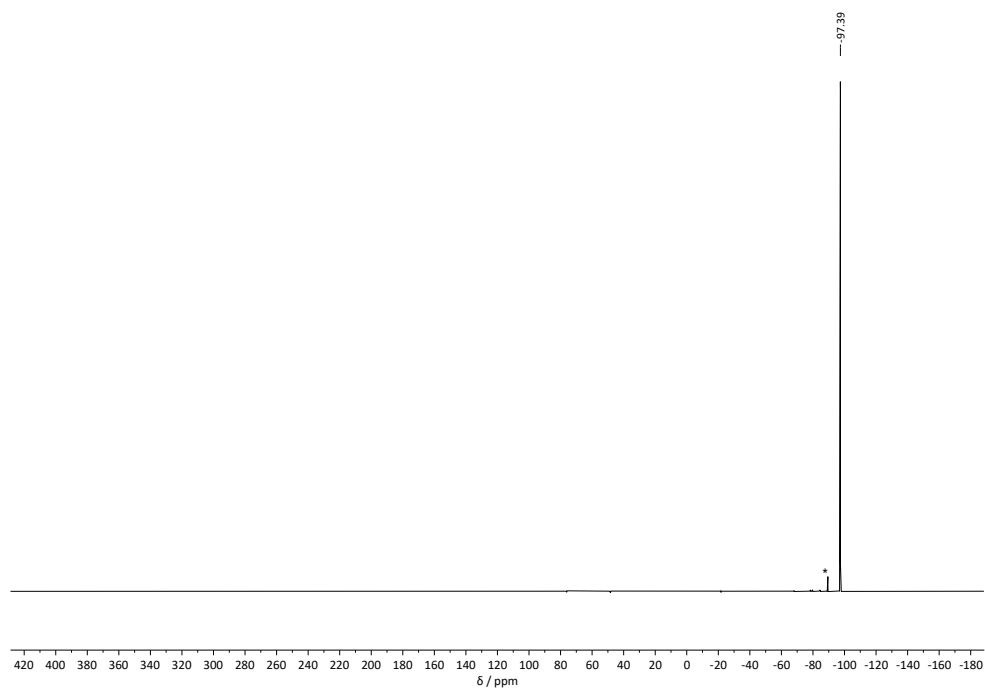

**Figure S14**  $^{31}\text{P}\{^1\text{H}\}$  NMR spectrum ( $\text{CD}_2\text{Cl}_2$ , 202.41 Hz, 298.0 K) of **6**.

3.7. 7

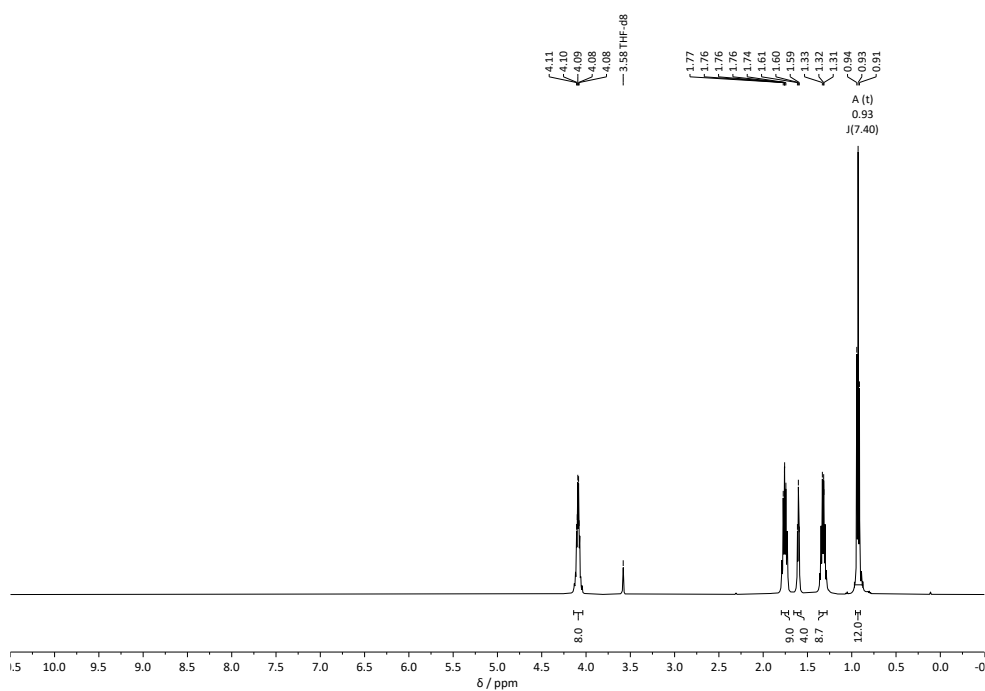

Figure S15  $^1\text{H}$  NMR spectrum (THF- $d_8$ , 499.96 Hz, 298.0 K) of **7**.

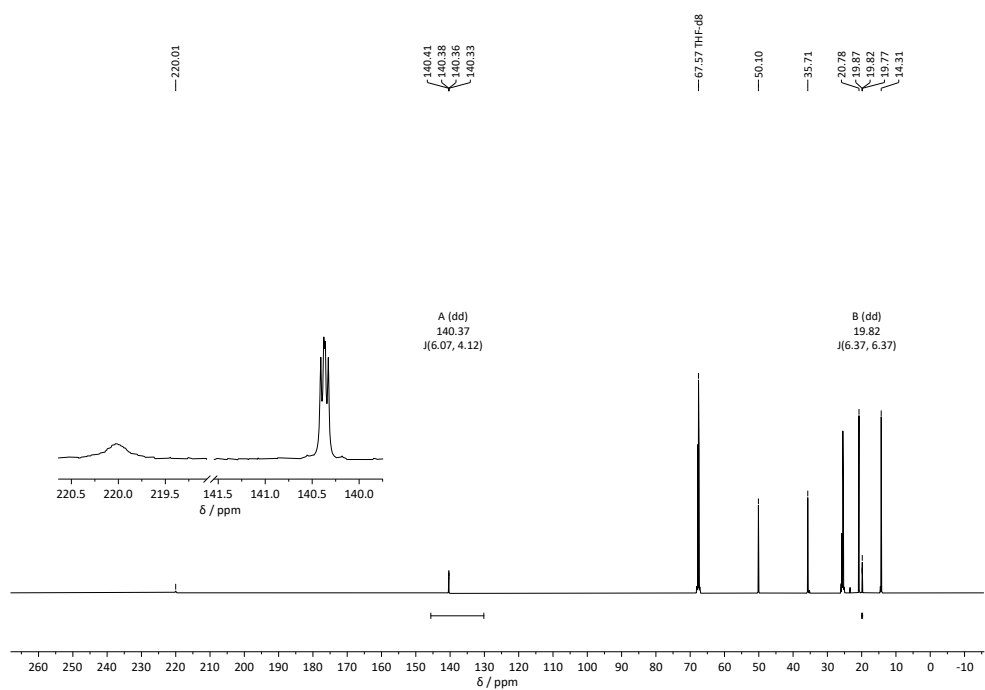

Figure S16  $^{13}\text{C}\{^1\text{H}\}$  NMR spectrum (THF- $d_8$ , 125.73 Hz, 298.0 K) of **7**.

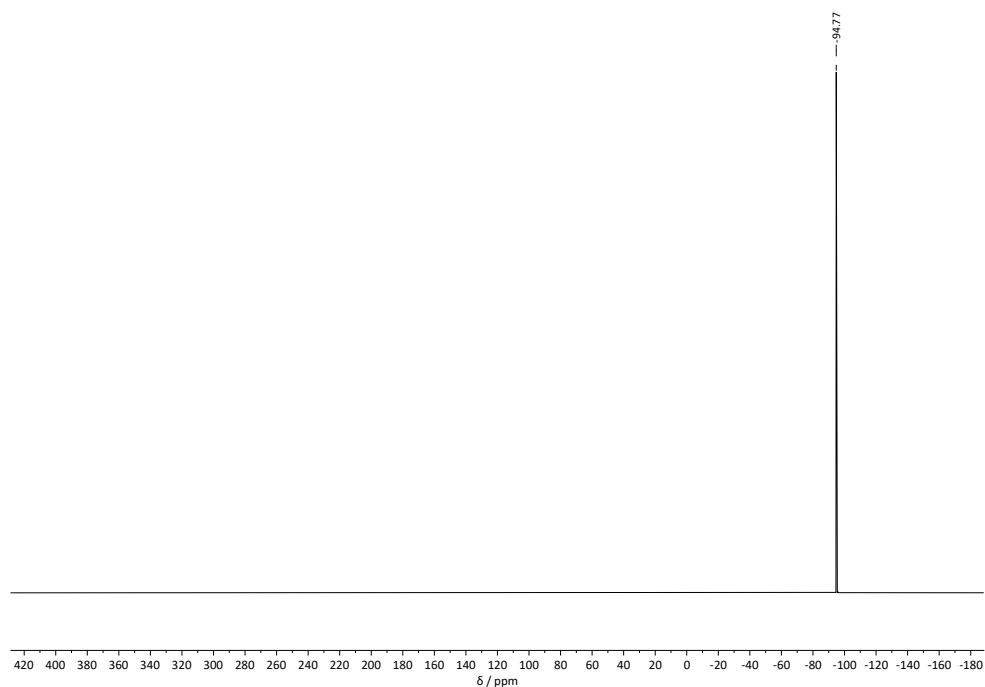

Figure S17  $^{31}\text{P}\{^1\text{H}\}$  NMR spectrum ( $\text{THF-d}_8$ , 202.41 Hz, 298.0 K) of **7**.

### 3.8. **8** in reaction mixture

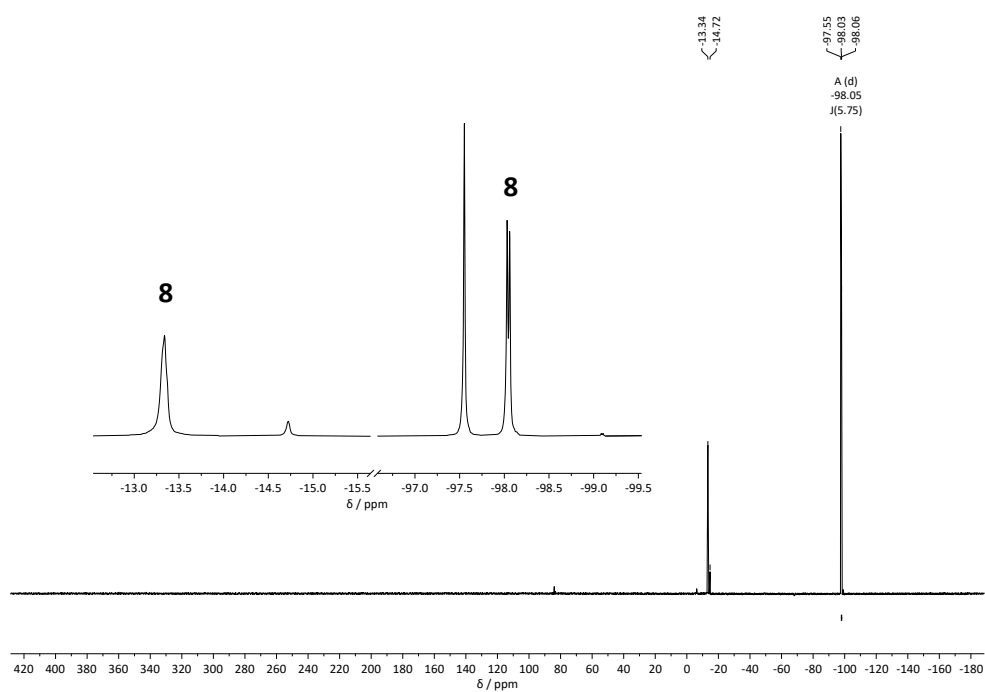

Figure S18  $^{31}\text{P}\{^1\text{H}\}$  NMR spectrum ( $\text{CD}_2\text{Cl}_2$ , 202.50 Hz, 298.0 K) of **8**.

3.9. 9

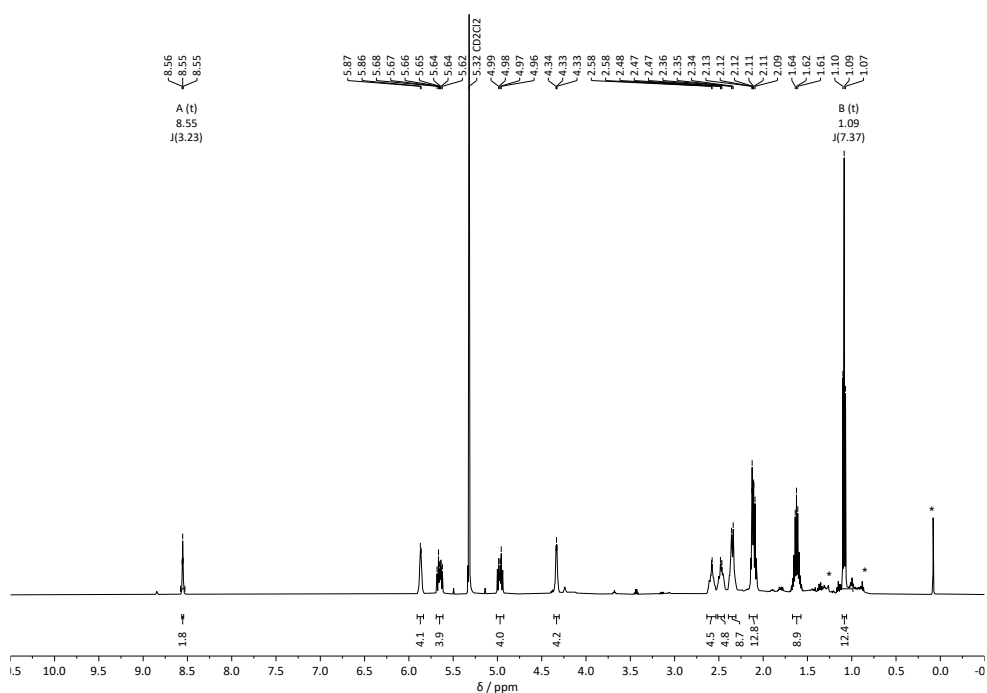

Figure S19 <sup>1</sup>H NMR spectrum (CD<sub>2</sub>Cl<sub>2</sub>, 499.96 Hz, 298.0 K) of 9.

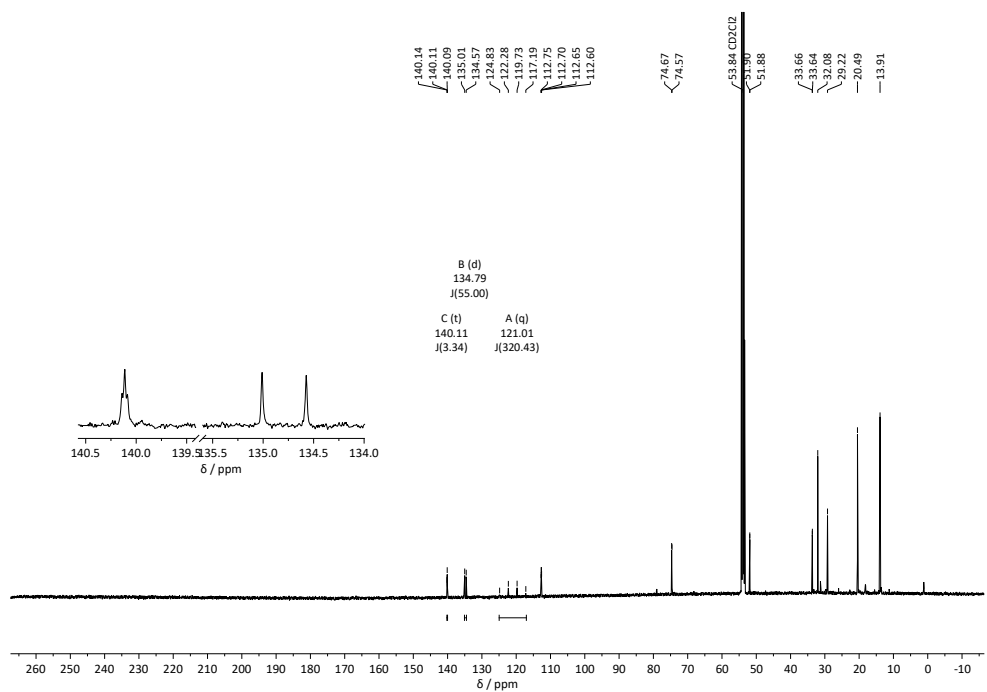

Figure S20 <sup>13</sup>C{<sup>1</sup>H} NMR spectrum (CD<sub>2</sub>Cl<sub>2</sub>, 125.73 Hz, 298.0 K) of 9.

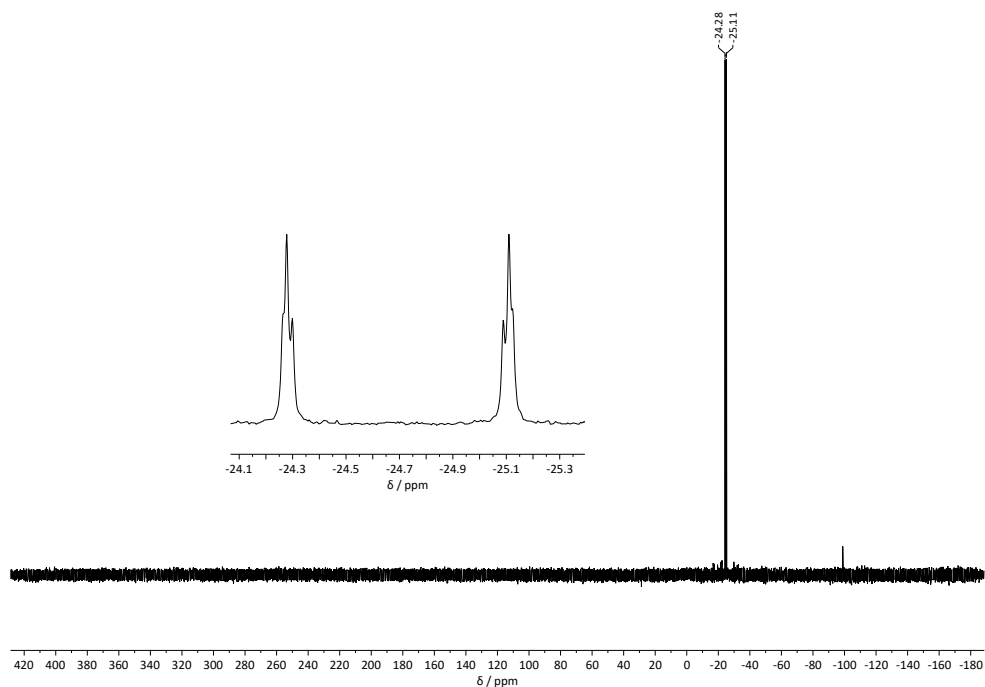

**Figure S21**  $^{31}\text{P}\{^1\text{H}\}$  NMR spectrum ( $\text{CD}_2\text{Cl}_2$ , 202.41 Hz, 298.0 K) of **9**.

### 3.10. Simulated $^{31}\text{P}\{^1\text{H}\}$ NMR signal of **9**

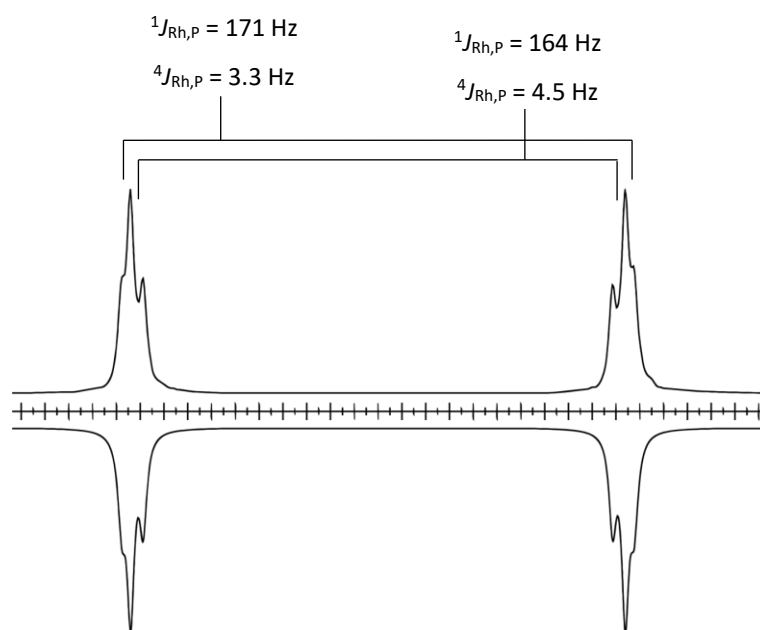

**Figure S22.** Experimental  $^{31}\text{P}\{^1\text{H}\}$  NMR spectrum of **9** (top) and simulated spectrum (bottom).



### 3.11. 10 in reaction mixture

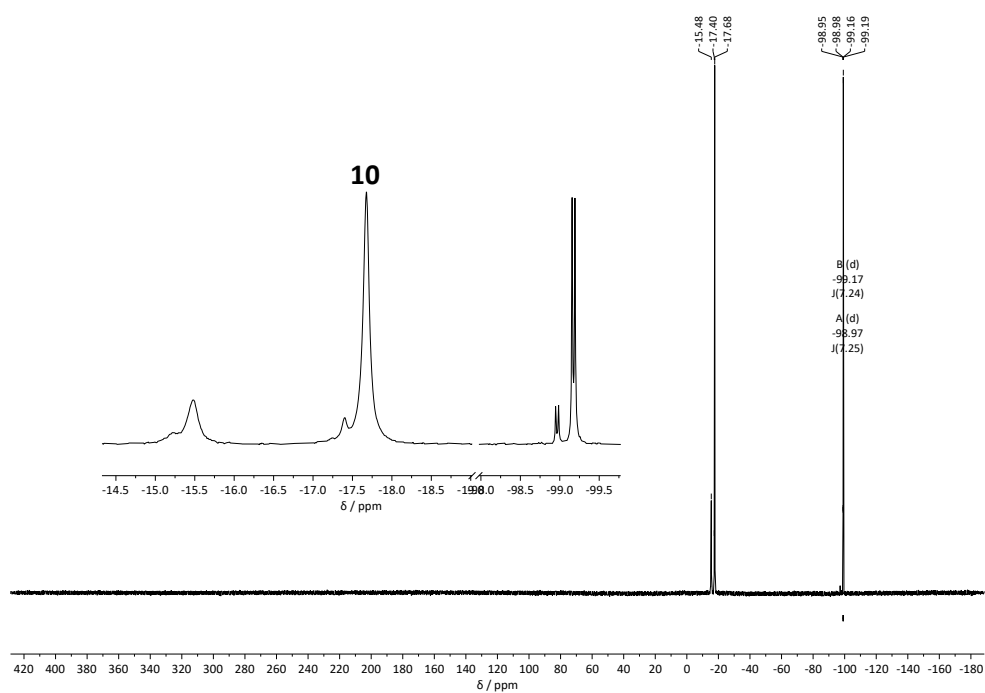

Figure S23  $^{31}\text{P}\{^1\text{H}\}$  NMR spectrum ( $\text{CD}_2\text{Cl}_2$ , 202.50 Hz, 298.0 K) of **10**.

### 3.12. 11

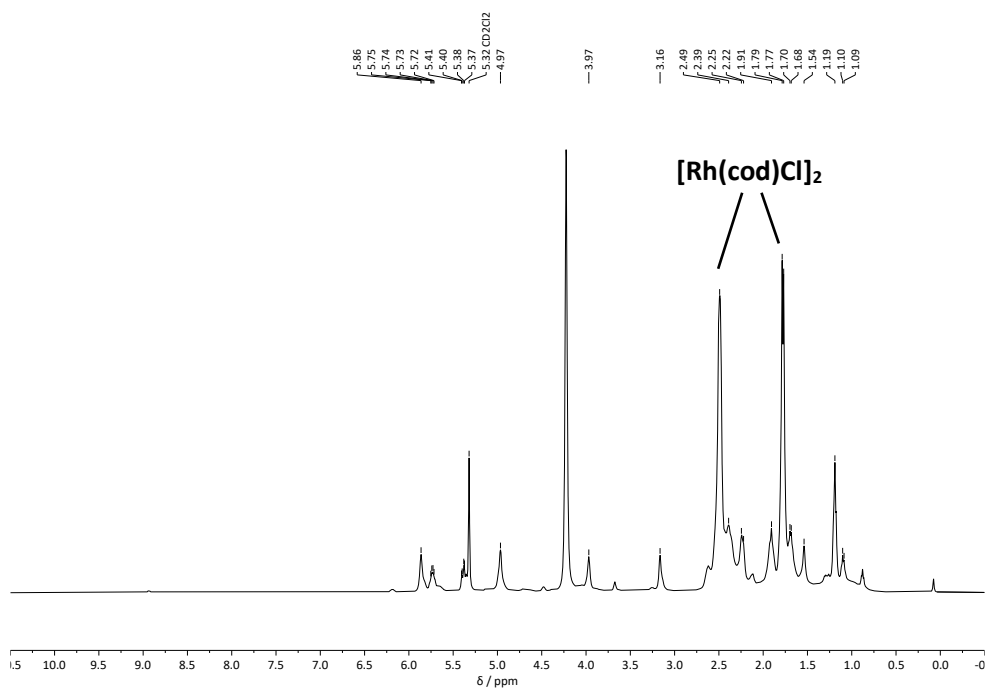

Figure S24  $^1\text{H}$  NMR spectrum ( $\text{CD}_2\text{Cl}_2$ , 500.18 Hz, 298.0 K) of **11**.

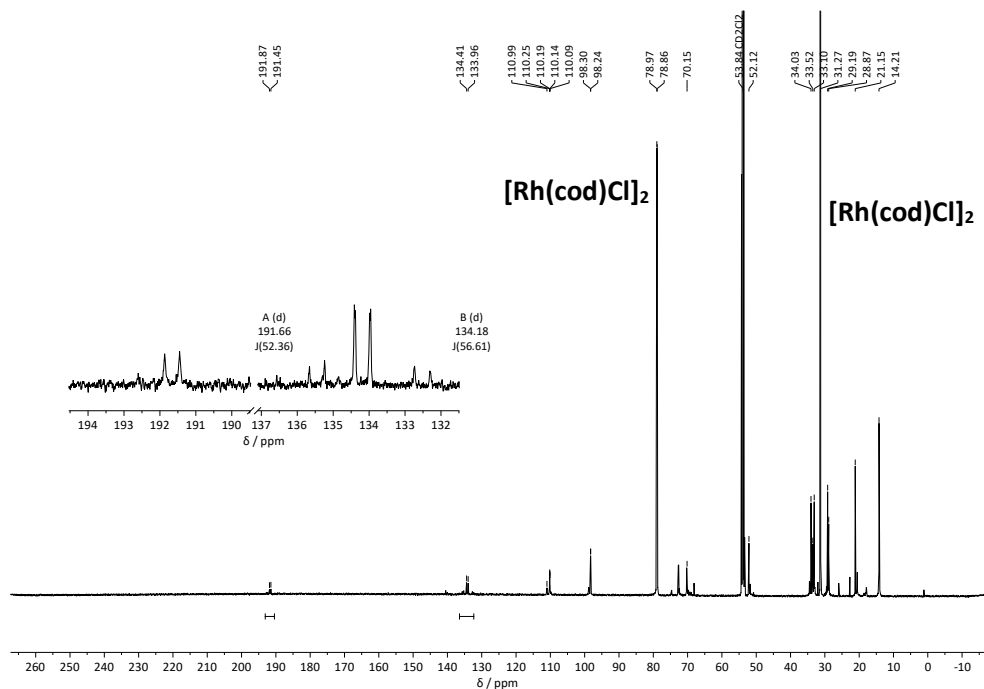

Figure S25 <sup>13</sup>C{<sup>1</sup>H} NMR spectrum (C<sub>6</sub>D<sub>6</sub>, 125.73 Hz, 298.0 K) of **7a**.

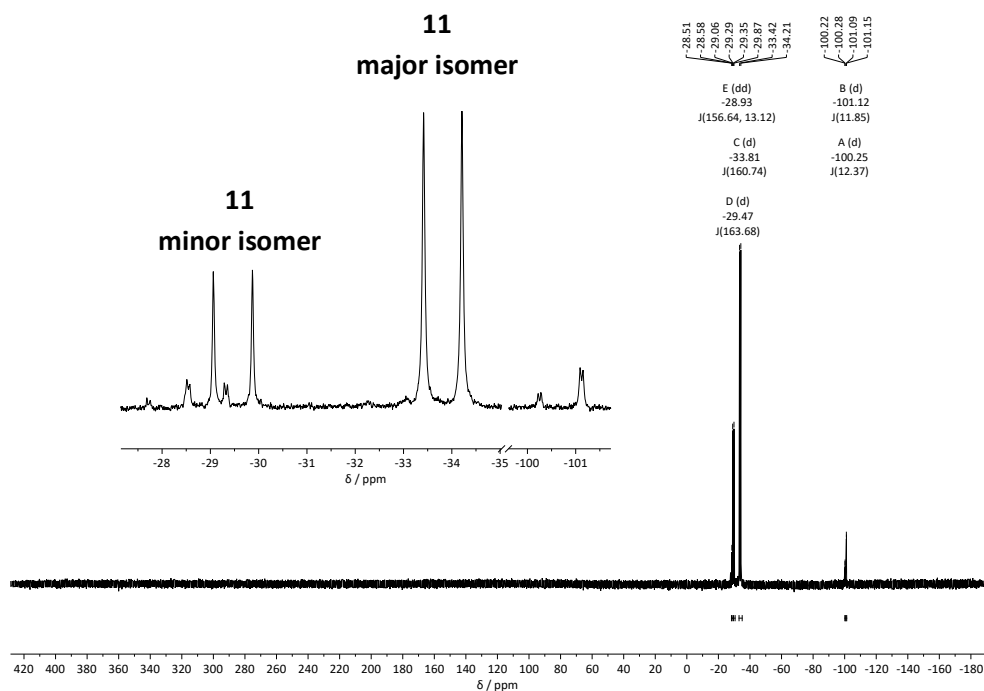

Figure S26 <sup>31</sup>P{<sup>1</sup>H} NMR spectrum (CD<sub>2</sub>Cl<sub>2</sub>, 202.50 Hz, 298.0 K) of **11**.

## 4. Single crystal X-ray diffraction studies

### 4.1. 4

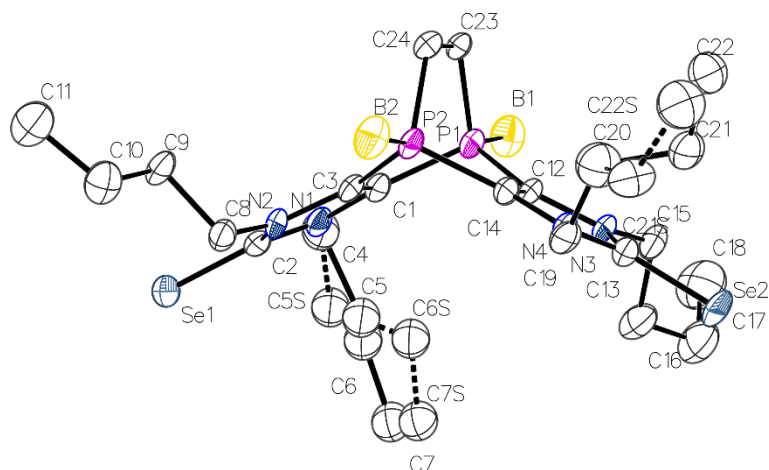

**Figure S27** Molecular structure of **4** in the single crystal. Thermal ellipsoids are set at 50 % probability level. Hydrogen atoms and solvent molecules were omitted for clarity.

**Table S1.** Crystal data and structure refinements for **4**.

|                                                              |                                                                                                                                                |
|--------------------------------------------------------------|------------------------------------------------------------------------------------------------------------------------------------------------|
| Identification code                                          | GSTR830, TT-893 // GXraycu_7878f                                                                                                               |
| Crystal habitus                                              | clear colourless plate                                                                                                                         |
| Device type                                                  | Bruker D8 Venture                                                                                                                              |
| Empirical formula                                            | C <sub>25</sub> H <sub>48</sub> B <sub>2</sub> Cl <sub>2</sub> N <sub>4</sub> P <sub>2</sub> Se <sub>2</sub>                                   |
| Moiety formula                                               | C <sub>25</sub> H <sub>48</sub> B <sub>2</sub> Cl <sub>2</sub> N <sub>4</sub> P <sub>2</sub> Se <sub>2</sub> , CH <sub>2</sub> Cl <sub>2</sub> |
| Formula weight / g mol <sup>-1</sup>                         | 717.05                                                                                                                                         |
| T / K                                                        | 100.0                                                                                                                                          |
| Crystal system                                               | monoclinic                                                                                                                                     |
| Space group                                                  | <i>P</i> 2 <sub>1</sub> / <i>n</i>                                                                                                             |
| <i>a</i> / Å                                                 | 9.5526(7)                                                                                                                                      |
| <i>b</i> / Å                                                 | 15.9233(12)                                                                                                                                    |
| <i>c</i> / Å                                                 | 23.092(2)                                                                                                                                      |
| $\alpha$ / °                                                 | 90                                                                                                                                             |
| $\beta$ / °                                                  | 101.475(6)                                                                                                                                     |
| $\gamma$ / °                                                 | 90                                                                                                                                             |
| <i>V</i> / Å <sup>3</sup>                                    | 3442.3(5)                                                                                                                                      |
| <i>Z</i>                                                     | 4                                                                                                                                              |
| $\rho_{calc}$ / g cm <sup>-3</sup>                           | 1.384                                                                                                                                          |
| $\mu$ / mm <sup>-1</sup>                                     | 5.147                                                                                                                                          |
| <i>F</i> (000)                                               | 1472.0                                                                                                                                         |
| Crystal size / mm <sup>3</sup>                               | 0.12 × 0.08 × 0.01                                                                                                                             |
| Absorption correction                                        | multi-scan                                                                                                                                     |
| <i>T</i> <sub>min</sub> ; <i>T</i> <sub>max</sub>            | 0.4963; 0.7538                                                                                                                                 |
| Radiation                                                    | Cu-K $\alpha$ ( $\lambda$ = 1.54178 Å)                                                                                                         |
| 2 $\theta$ range for data collection / °                     | 6.788 to 135.488                                                                                                                               |
| Completeness to $\theta$                                     | 0.999                                                                                                                                          |
| Index ranges                                                 | -11 ≤ <i>h</i> ≤ 11, -19 ≤ <i>k</i> ≤ 19, -27 ≤ <i>l</i> ≤ 27                                                                                  |
| Reflections collected                                        | 51353                                                                                                                                          |
| Independent reflections                                      | 6234 ( <i>R</i> <sub>int</sub> = 0.1538, <i>R</i> <sub><math>\sigma</math></sub> = 0.0841)                                                     |
| Data / restraints / parameters                               | 6234 / 121 / 405                                                                                                                               |
| Goodness-of-fit on <i>F</i> <sup>2</sup>                     | 1.021                                                                                                                                          |
| Final <i>R</i> indexes ( <i>I</i> ≥ 2 $\sigma$ ( <i>I</i> )) | <i>R</i> <sub>1</sub> = 0.0527, $\omega$ <i>R</i> <sub>2</sub> = 0.1219                                                                        |
| Final <i>R</i> indexes (all data)                            | <i>R</i> <sub>1</sub> = 0.0856, $\omega$ <i>R</i> <sub>2</sub> = 0.1382                                                                        |
| Largest diff. peak / hole / e Å <sup>-3</sup>                | 1.10 / -0.86                                                                                                                                   |

**Table S2.** Bond lengths for **4**.

| Atom | Atom | Length / Å | Atom | Atom | Length / Å |
|------|------|------------|------|------|------------|
| Se1  | C2   | 1.837(4)   | C1   | C3   | 1.361(7)   |
| Se2  | C13  | 1.847(4)   | C4   | C5   | 1.662(13)  |
| P1   | C1   | 1.806(5)   | C4   | C5S  | 1.484(8)   |
| P1   | C12  | 1.802(4)   | C5   | C6   | 1.503(9)   |
| P1   | C23  | 1.835(5)   | C5S  | C6S  | 1.505(9)   |
| P1   | B1   | 1.906(7)   | C6   | C7   | 1.508(9)   |
| P2   | C3   | 1.801(5)   | C6S  | C7S  | 1.504(9)   |
| P2   | C14  | 1.814(5)   | C8   | C9   | 1.517(6)   |
| P2   | C24  | 1.827(5)   | C9   | C10  | 1.512(8)   |
| P2   | B2   | 1.909(7)   | C10  | C11  | 1.509(8)   |
| N1   | C1   | 1.394(6)   | C12  | C14  | 1.357(7)   |
| N1   | C2   | 1.358(6)   | C15  | C16  | 1.512(8)   |
| N1   | C4   | 1.463(7)   | C16  | C17  | 1.528(8)   |
| N2   | C2   | 1.359(6)   | C17  | C18  | 1.503(11)  |
| N2   | C3   | 1.381(6)   | C19  | C20  | 1.487(8)   |
| N2   | C8   | 1.474(6)   | C20  | C21  | 1.455(7)   |
| N3   | C12  | 1.387(5)   | C20  | C21S | 1.448(8)   |
| N3   | C13  | 1.354(6)   | C21  | C22  | 1.513(12)  |
| N3   | C15  | 1.467(7)   | C21S | C22S | 1.502(17)  |
| N4   | C13  | 1.371(6)   | C23  | C24  | 1.538(7)   |
| N4   | C14  | 1.371(6)   | Cl1  | C27  | 1.759(6)   |
| N4   | C19  | 1.460(7)   | Cl2  | C27  | 1.764(6)   |

**Table S3.** Bond angles for **4**.

| Atom | Atom | Atom | Angle / ° | Atom | Atom | Atom | Angle / ° |
|------|------|------|-----------|------|------|------|-----------|
| C1   | P1   | C23  | 99.3(2)   | C1   | C3   | P2   | 120.1(3)  |
| C1   | P1   | B1   | 122.2(3)  | C1   | C3   | N2   | 107.5(4)  |
| C12  | P1   | C1   | 97.3(2)   | N1   | C4   | C5   | 101.6(5)  |
| C12  | P1   | C23  | 99.0(2)   | N1   | C4   | C5S  | 121.5(7)  |
| C12  | P1   | B1   | 121.6(2)  | C6   | C5   | C4   | 111.1(8)  |
| C23  | P1   | B1   | 112.8(3)  | C4   | C5S  | C6S  | 111.0(8)  |
| C3   | P2   | C14  | 97.8(2)   | C5   | C6   | C7   | 110.2(9)  |
| C3   | P2   | C24  | 99.0(2)   | C5S  | C6S  | C7S  | 112.1(8)  |
| C3   | P2   | B2   | 120.8(3)  | N2   | C8   | C9   | 112.4(4)  |
| C14  | P2   | C24  | 99.2(2)   | C10  | C9   | C8   | 111.2(4)  |
| C14  | P2   | B2   | 122.3(2)  | C11  | C10  | C9   | 114.1(5)  |
| C24  | P2   | B2   | 113.4(3)  | N3   | C12  | P1   | 132.6(4)  |
| C1   | N1   | C4   | 126.5(4)  | C14  | C12  | P1   | 120.3(3)  |
| C2   | N1   | C1   | 109.0(4)  | C14  | C12  | N3   | 106.9(4)  |
| C2   | N1   | C4   | 124.5(4)  | N3   | C13  | Se2  | 126.5(3)  |
| C2   | N2   | C3   | 109.3(4)  | N3   | C13  | N4   | 107.2(3)  |
| C2   | N2   | C8   | 124.1(4)  | N4   | C13  | Se2  | 126.3(3)  |
| C3   | N2   | C8   | 126.6(4)  | N4   | C14  | P2   | 131.7(4)  |
| C12  | N3   | C15  | 127.1(4)  | C12  | C14  | P2   | 119.9(3)  |
| C13  | N3   | C12  | 109.0(4)  | C12  | C14  | N4   | 108.3(4)  |
| C13  | N3   | C15  | 123.9(4)  | N3   | C15  | C16  | 112.6(4)  |
| C13  | N4   | C14  | 108.4(4)  | C15  | C16  | C17  | 112.7(5)  |
| C13  | N4   | C19  | 125.0(4)  | C18  | C17  | C16  | 114.2(5)  |
| C14  | N4   | C19  | 126.6(4)  | N4   | C19  | C20  | 113.6(5)  |
| N1   | C1   | P1   | 132.7(4)  | C21  | C20  | C19  | 123.3(6)  |
| C3   | C1   | P1   | 120.1(3)  | C21S | C20  | C19  | 117.4(7)  |
| C3   | C1   | N1   | 107.1(4)  | C20  | C21  | C22  | 114.6(7)  |

|    |    |     |          |     |      |      |           |
|----|----|-----|----------|-----|------|------|-----------|
| N1 | C2 | Se1 | 126.4(4) | C20 | C21S | C22S | 112.7(12) |
| N1 | C2 | N2  | 107.1(4) | C24 | C23  | P1   | 116.5(3)  |
| N2 | C2 | Se1 | 126.5(4) | C23 | C24  | P2   | 116.5(3)  |
| N2 | C3 | P2  | 132.3(4) | Cl1 | C27  | Cl2  | 110.3(3)  |

#### 4.2. 5

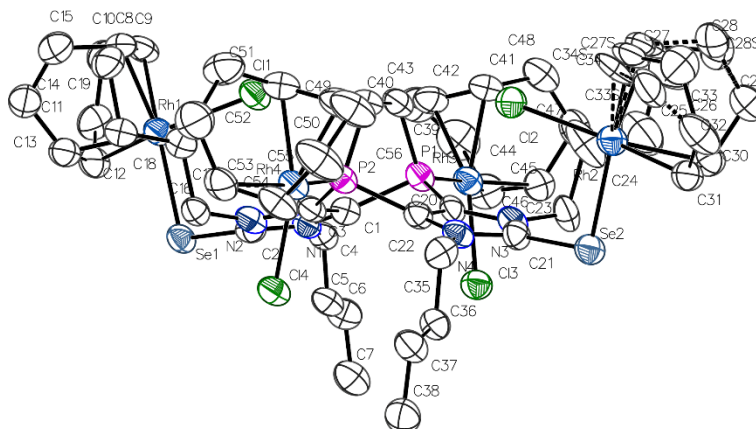

**Figure S28** Molecular structure of **5** in the single crystal. Thermal ellipsoids are set at 50 % probability level. Hydrogen atoms and solvent molecules were omitted for clarity.

**Table S4.** Crystal data and structure refinements for **5**.

|                                                              |                                                                                                                                                 |
|--------------------------------------------------------------|-------------------------------------------------------------------------------------------------------------------------------------------------|
| Identification code                                          | GSTR816, TT-808 // GXray7481_3d                                                                                                                 |
| Crystal habitus                                              | clear yellow plate                                                                                                                              |
| Device type                                                  | STOE STADIVARI                                                                                                                                  |
| Empirical formula                                            | C <sub>70</sub> H <sub>104</sub> Cl <sub>4</sub> N <sub>4</sub> P <sub>2</sub> Rh <sub>4</sub> Se <sub>2</sub>                                  |
| Moiety formula                                               | C <sub>56</sub> H <sub>88</sub> Cl <sub>4</sub> N <sub>4</sub> P <sub>2</sub> Rh <sub>4</sub> Se <sub>2</sub> , 2 C <sub>7</sub> H <sub>8</sub> |
| Formula weight / g mol <sup>-1</sup>                         | 1774.87                                                                                                                                         |
| T / K                                                        | 100                                                                                                                                             |
| Crystal system                                               | triclinic                                                                                                                                       |
| Space group                                                  | <i>P</i> -1                                                                                                                                     |
| <i>a</i> / Å                                                 | 13.2812(4)                                                                                                                                      |
| <i>b</i> / Å                                                 | 15.1399(5)                                                                                                                                      |
| <i>c</i> / Å                                                 | 20.6038(7)                                                                                                                                      |
| $\alpha$ / °                                                 | 109.729(2)                                                                                                                                      |
| $\beta$ / °                                                  | 92.124(3)                                                                                                                                       |
| $\gamma$ / °                                                 | 106.197(2)                                                                                                                                      |
| <i>V</i> / Å <sup>3</sup>                                    | 3705.3(2)                                                                                                                                       |
| <i>Z</i>                                                     | 2                                                                                                                                               |
| $\rho_{calc}$ / g cm <sup>-3</sup>                           | 1.591                                                                                                                                           |
| $\mu$ / mm <sup>-1</sup>                                     | 10.254                                                                                                                                          |
| <i>F</i> (000)                                               | 1796.0                                                                                                                                          |
| Crystal size / mm <sup>3</sup>                               | 0.12 × 0.1 × 0.05                                                                                                                               |
| Absorption correction                                        | multi-scan                                                                                                                                      |
| <i>T</i> <sub>min</sub> ; <i>T</i> <sub>max</sub>            | 0.0800; 0.2369                                                                                                                                  |
| Radiation                                                    | Cu-K $\alpha$ ( $\lambda$ = 1.54178 Å)                                                                                                          |
| 2 $\theta$ range for data collection / °                     | 9.218 to 141.094                                                                                                                                |
| Completeness to $\theta$                                     | 0.987                                                                                                                                           |
| Index ranges                                                 | -16 ≤ <i>h</i> ≤ 15, -15 ≤ <i>k</i> ≤ 18, -24 ≤ <i>l</i> ≤ 11                                                                                   |
| Reflections collected                                        | 54383                                                                                                                                           |
| Independent reflections                                      | 13818 ( <i>R</i> <sub>int</sub> = 0.0458, <i>R</i> <sub><math>\sigma</math></sub> = 0.0426)                                                     |
| Data / restraints / parameters                               | 13851 / 1132 / 896                                                                                                                              |
| Goodness-of-fit on <i>F</i> <sup>2</sup>                     | 1.107                                                                                                                                           |
| Final <i>R</i> indexes ( <i>I</i> ≥ 2 $\sigma$ ( <i>I</i> )) | <i>R</i> <sub>1</sub> = 0.0697, $\omega R$ <sub>2</sub> = 0.1723                                                                                |

Final  $R$  indexes (all data)  
Largest diff. peak / hole /  $e \text{ \AA}^{-3}$

$R_1 = 0.0951$ ,  $\omega R_2 = 0.1874$   
1.50 / -1.35

**Table S5.** Bond lengths for 5.

| Atom | Atom | Length / $\text{\AA}$ | Atom | Atom | Length / $\text{\AA}$ |
|------|------|-----------------------|------|------|-----------------------|
| Rh1  | Se1  | 2.5039(12)            | C24  | C25  | 1.459(18)             |
| Rh1  | Cl1  | 2.401(2)              | C25  | C26  | 1.52(2)               |
| Rh1  | C8   | 2.108(10)             | C27  | C28  | 1.51(3)               |
| Rh1  | C9   | 2.124(10)             | C27  | C34  | 1.36(3)               |
| Rh1  | C12  | 2.111(9)              | C28  | C29  | 1.38(2)               |
| Rh1  | C13  | 2.140(10)             | C27S | C28S | 1.51(3)               |
| Rh2  | Se2  | 2.4996(12)            | C27S | C34S | 1.35(4)               |
| Rh2  | Cl2  | 2.378(2)              | C28S | C29  | 1.62(3)               |
| Rh2  | C27  | 2.16(2)               | C29  | C30  | 1.520(15)             |
| Rh2  | C27S | 2.15(3)               | C30  | C31  | 1.386(16)             |
| Rh2  | C30  | 2.106(11)             | C31  | C32  | 1.521(15)             |
| Rh2  | C31  | 2.122(11)             | C32  | C33  | 1.61(3)               |
| Rh2  | C34  | 2.10(2)               | C32  | C33S | 1.41(3)               |
| Rh2  | C34S | 2.16(2)               | C33  | C34  | 1.53(3)               |
| Rh3  | Cl3  | 2.358(2)              | C33S | C34S | 1.47(3)               |
| Rh3  | P1   | 2.256(2)              | C35  | C36  | 1.539(13)             |
| Rh3  | C41  | 2.121(10)             | C36  | C37  | 1.525(14)             |
| Rh3  | C42  | 2.122(11)             | C37  | C38  | 1.522(16)             |
| Rh3  | C45  | 2.224(11)             | C39  | C40  | 1.546(12)             |
| Rh3  | C46  | 2.228(11)             | C41  | C42  | 1.366(15)             |
| Rh4  | Cl4  | 2.361(2)              | C41  | C48  | 1.535(15)             |
| Rh4  | P2   | 2.261(2)              | C42  | C43  | 1.525(15)             |
| Rh4  | C49  | 2.143(10)             | C43  | C44  | 1.505(17)             |
| Rh4  | C50  | 2.133(11)             | C44  | C45  | 1.527(16)             |
| Rh4  | C53  | 2.223(12)             | C45  | C46  | 1.379(16)             |
| Rh4  | C54  | 2.231(11)             | C46  | C47  | 1.504(16)             |
| Se1  | C2   | 1.870(9)              | C47  | C48  | 1.516(16)             |
| Se2  | C21  | 1.869(9)              | C49  | C50  | 1.417(16)             |
| P1   | C1   | 1.828(9)              | C49  | C56  | 1.502(11)             |
| P1   | C20  | 1.823(9)              | C50  | C51  | 1.494(12)             |
| P1   | C39  | 1.851(9)              | C51  | C52  | 1.472(12)             |
| P2   | C3   | 1.820(9)              | C52  | C53  | 1.465(12)             |
| P2   | C22  | 1.834(10)             | C53  | C54  | 1.371(17)             |
| P2   | C40  | 1.864(9)              | C54  | C55  | 1.470(12)             |
| N1   | C1   | 1.387(11)             | C55  | C56  | 1.460(11)             |
| N1   | C2   | 1.349(12)             | C57  | C58  | 1.3900                |
| N1   | C4   | 1.472(11)             | C57  | C62  | 1.3900                |
| N2   | C2   | 1.354(11)             | C57  | C63  | 1.5399(10)            |
| N2   | C3   | 1.385(11)             | C58  | C59  | 1.3900                |
| N2   | C16  | 1.477(12)             | C59  | C60  | 1.3900                |
| N3   | C20  | 1.375(12)             | C60  | C61  | 1.3900                |
| N3   | C21  | 1.363(12)             | C61  | C62  | 1.3900                |
| N3   | C23  | 1.470(13)             | C64  | C65  | 1.3900                |
| N4   | C21  | 1.339(12)             | C64  | C69  | 1.3900                |
| N4   | C22  | 1.383(11)             | C64  | C70  | 1.44(4)               |
| N4   | C35  | 1.473(12)             | C65  | C66  | 1.3900                |
| C1   | C3   | 1.342(13)             | C66  | C67  | 1.3900                |
| C4   | C5   | 1.490(13)             | C67  | C68  | 1.3900                |
| C5   | C6   | 1.529(13)             | C68  | C69  | 1.3900                |
| C6   | C7   | 1.523(14)             | C64S | C65S | 1.3900                |
| C8   | C9   | 1.390(14)             | C64S | C69S | 1.3900                |

|     |     |           |      |      |           |
|-----|-----|-----------|------|------|-----------|
| C8  | C15 | 1.520(14) | C64S | C70S | 1.44(3)   |
| C9  | C10 | 1.523(13) | C65S | C66S | 1.3900    |
| C10 | C11 | 1.534(14) | C66S | C67S | 1.3900    |
| C11 | C12 | 1.496(15) | C67S | C68S | 1.3900    |
| C12 | C13 | 1.407(15) | C68S | C69S | 1.3900    |
| C13 | C14 | 1.497(15) | C57A | C58A | 1.3900    |
| C14 | C15 | 1.544(14) | C57A | C62A | 1.3900    |
| C16 | C17 | 1.531(13) | C57A | C63A | 1.530(16) |
| C17 | C18 | 1.511(14) | C58A | C59A | 1.3900    |
| C18 | C19 | 1.538(15) | C59A | C60A | 1.3900    |
| C20 | C22 | 1.333(13) | C60A | C61A | 1.3900    |
| C23 | C24 | 1.565(15) | C61A | C62A | 1.3900    |

**Table S6.** Bond angles for **5**.

| Atom | Atom | Atom | Angle / ° | Atom | Atom | Atom | Angle / ° |
|------|------|------|-----------|------|------|------|-----------|
| Cl1  | Rh1  | Se1  | 95.02(6)  | C13  | C12  | C11  | 125.3(10) |
| C8   | Rh1  | Se1  | 156.4(3)  | C12  | C13  | Rh1  | 69.6(6)   |
| C8   | Rh1  | Cl1  | 89.6(3)   | C12  | C13  | C14  | 123.4(10) |
| C8   | Rh1  | C9   | 38.4(4)   | C14  | C13  | Rh1  | 114.8(7)  |
| C8   | Rh1  | C12  | 97.8(4)   | C13  | C14  | C15  | 111.5(9)  |
| C8   | Rh1  | C13  | 80.3(4)   | C8   | C15  | C14  | 110.6(9)  |
| C9   | Rh1  | Se1  | 164.3(3)  | N2   | C16  | C17  | 110.0(7)  |
| C9   | Rh1  | Cl1  | 88.8(3)   | C18  | C17  | C16  | 111.3(8)  |
| C9   | Rh1  | C13  | 89.4(4)   | C17  | C18  | C19  | 109.7(8)  |
| C12  | Rh1  | Se1  | 87.9(3)   | N3   | C20  | P1   | 130.0(7)  |
| C12  | Rh1  | Cl1  | 154.4(3)  | C22  | C20  | P1   | 120.7(7)  |
| C12  | Rh1  | C9   | 82.3(4)   | C22  | C20  | N3   | 108.5(8)  |
| C12  | Rh1  | C13  | 38.7(4)   | N3   | C21  | Se2  | 125.3(7)  |
| C13  | Rh1  | Se1  | 90.5(3)   | N4   | C21  | Se2  | 127.1(7)  |
| C13  | Rh1  | Cl1  | 165.8(3)  | N4   | C21  | N3   | 107.5(8)  |
| Cl2  | Rh2  | Se2  | 94.36(6)  | N4   | C22  | P2   | 127.2(7)  |
| C27  | Rh2  | Se2  | 149.8(7)  | C20  | C22  | P2   | 121.9(7)  |
| C27  | Rh2  | Cl2  | 89.0(6)   | C20  | C22  | N4   | 107.3(8)  |
| C27S | Rh2  | Se2  | 170.5(8)  | N3   | C23  | C24  | 109.8(9)  |
| C27S | Rh2  | Cl2  | 89.6(7)   | C25  | C24  | C23  | 112.8(11) |
| C27S | Rh2  | C34S | 36.5(10)  | C24  | C25  | C26  | 111.7(14) |
| C30  | Rh2  | Se2  | 89.2(3)   | C28  | C27  | Rh2  | 112.4(15) |
| C30  | Rh2  | Cl2  | 161.8(3)  | C34  | C27  | Rh2  | 69.1(13)  |
| C30  | Rh2  | C27  | 79.1(7)   | C34  | C27  | C28  | 123(2)    |
| C30  | Rh2  | C27S | 84.4(8)   | C29  | C28  | C27  | 110.5(18) |
| C30  | Rh2  | C31  | 38.3(4)   | C28S | C27S | Rh2  | 109.7(17) |
| C30  | Rh2  | C34S | 98.0(7)   | C34S | C27S | Rh2  | 72.2(14)  |
| C31  | Rh2  | Se2  | 88.8(3)   | C34S | C27S | C28S | 123(2)    |
| C31  | Rh2  | Cl2  | 159.4(3)  | C27S | C28S | C29  | 116.6(17) |
| C31  | Rh2  | C27  | 98.4(7)   | C28  | C29  | C30  | 117.6(12) |
| C31  | Rh2  | C27S | 90.5(8)   | C30  | C29  | C28S | 108.8(12) |
| C31  | Rh2  | C34S | 80.8(7)   | C29  | C30  | Rh2  | 112.1(8)  |
| C34  | Rh2  | Se2  | 171.3(7)  | C31  | C30  | Rh2  | 71.5(7)   |
| C34  | Rh2  | Cl2  | 90.8(7)   | C31  | C30  | C29  | 124.6(10) |
| C34  | Rh2  | C27  | 37.1(9)   | C30  | C31  | Rh2  | 70.2(6)   |
| C34  | Rh2  | C30  | 88.0(8)   | C30  | C31  | C32  | 123.2(10) |
| C34  | Rh2  | C31  | 83.9(7)   | C32  | C31  | Rh2  | 111.0(8)  |
| C34S | Rh2  | Se2  | 152.2(8)  | C31  | C32  | C33  | 110.2(12) |
| C34S | Rh2  | Cl2  | 87.1(7)   | C33S | C32  | C31  | 116.8(13) |
| P1   | Rh3  | Cl3  | 86.29(9)  | C34  | C33  | C32  | 114.1(16) |
| C41  | Rh3  | Cl3  | 163.5(3)  | C27  | C34  | Rh2  | 73.8(13)  |

|     |     |     |          |      |      |      |           |
|-----|-----|-----|----------|------|------|------|-----------|
| C41 | Rh3 | P1  | 96.2(3)  | C27  | C34  | C33  | 126(2)    |
| C41 | Rh3 | C42 | 37.6(4)  | C33  | C34  | Rh2  | 112.1(16) |
| C41 | Rh3 | C45 | 89.4(4)  | C32  | C33S | C34S | 115(2)    |
| C41 | Rh3 | C46 | 81.4(4)  | C27S | C34S | Rh2  | 71.3(15)  |
| C42 | Rh3 | Cl3 | 158.9(3) | C27S | C34S | C33S | 122(2)    |
| C42 | Rh3 | P1  | 93.0(3)  | C33S | C34S | Rh2  | 110.8(17) |
| C42 | Rh3 | C45 | 81.3(4)  | N4   | C35  | C36  | 110.0(8)  |
| C42 | Rh3 | C46 | 96.0(4)  | C37  | C36  | C35  | 111.1(9)  |
| C45 | Rh3 | Cl3 | 93.1(3)  | C38  | C37  | C36  | 109.0(10) |
| C45 | Rh3 | P1  | 162.3(3) | C40  | C39  | P1   | 117.5(6)  |
| C45 | Rh3 | C46 | 36.1(4)  | C39  | C40  | P2   | 116.7(6)  |
| C46 | Rh3 | Cl3 | 91.0(3)  | C42  | C41  | Rh3  | 71.2(6)   |
| C46 | Rh3 | P1  | 161.5(3) | C42  | C41  | C48  | 125.1(10) |
| P2  | Rh4 | Cl4 | 87.76(8) | C48  | C41  | Rh3  | 113.6(7)  |
| C49 | Rh4 | Cl4 | 158.8(3) | C41  | C42  | Rh3  | 71.2(6)   |
| C49 | Rh4 | P2  | 93.8(3)  | C41  | C42  | C43  | 126.1(10) |
| C49 | Rh4 | C53 | 92.2(4)  | C43  | C42  | Rh3  | 109.8(7)  |
| C49 | Rh4 | C54 | 80.8(4)  | C44  | C43  | C42  | 114.7(10) |
| C50 | Rh4 | Cl4 | 162.1(3) | C43  | C44  | C45  | 112.3(10) |
| C50 | Rh4 | P2  | 95.6(3)  | C44  | C45  | Rh3  | 111.2(8)  |
| C50 | Rh4 | C49 | 38.7(4)  | C46  | C45  | Rh3  | 72.1(7)   |
| C50 | Rh4 | C53 | 80.2(4)  | C46  | C45  | C44  | 122.4(11) |
| C50 | Rh4 | C54 | 92.4(4)  | C45  | C46  | Rh3  | 71.8(7)   |
| C53 | Rh4 | Cl4 | 91.8(3)  | C45  | C46  | C47  | 124.7(11) |
| C53 | Rh4 | P2  | 164.3(3) | C47  | C46  | Rh3  | 108.9(8)  |
| C53 | Rh4 | C54 | 35.9(4)  | C46  | C47  | C48  | 114.9(10) |
| C54 | Rh4 | Cl4 | 90.4(3)  | C47  | C48  | C41  | 114.5(9)  |
| C54 | Rh4 | P2  | 159.8(3) | C50  | C49  | Rh4  | 70.3(6)   |
| C2  | Se1 | Rh1 | 100.1(3) | C50  | C49  | C56  | 124.1(11) |
| C21 | Se2 | Rh2 | 99.8(3)  | C56  | C49  | Rh4  | 111.9(7)  |
| C1  | P1  | Rh3 | 118.1(3) | C49  | C50  | Rh4  | 71.0(6)   |
| C1  | P1  | C39 | 96.3(4)  | C49  | C50  | C51  | 125.4(10) |
| C20 | P1  | Rh3 | 121.9(3) | C51  | C50  | Rh4  | 112.2(7)  |
| C20 | P1  | C1  | 97.7(4)  | C52  | C51  | C50  | 116.3(10) |
| C20 | P1  | C39 | 96.6(4)  | C53  | C52  | C51  | 116.9(10) |
| C39 | P1  | Rh3 | 120.7(3) | C52  | C53  | Rh4  | 111.2(8)  |
| C3  | P2  | Rh4 | 124.1(3) | C54  | C53  | Rh4  | 72.4(7)   |
| C3  | P2  | C22 | 97.4(4)  | C54  | C53  | C52  | 121.9(12) |
| C3  | P2  | C40 | 96.5(4)  | C53  | C54  | Rh4  | 71.7(7)   |
| C22 | P2  | Rh4 | 117.4(3) | C53  | C54  | C55  | 125.9(12) |
| C22 | P2  | C40 | 96.6(4)  | C55  | C54  | Rh4  | 108.8(8)  |
| C40 | P2  | Rh4 | 119.2(3) | C56  | C55  | C54  | 118.7(10) |
| C1  | N1  | C4  | 128.7(8) | C55  | C56  | C49  | 116.4(9)  |
| C2  | N1  | C1  | 108.1(7) | C58  | C57  | C62  | 120.0     |
| C2  | N1  | C4  | 123.1(7) | C58  | C57  | C63  | 123.8(15) |
| C2  | N2  | C3  | 108.2(7) | C62  | C57  | C63  | 116.2(15) |
| C2  | N2  | C16 | 124.7(7) | C57  | C58  | C59  | 120.0     |
| C3  | N2  | C16 | 126.0(7) | C58  | C59  | C60  | 120.0     |
| C20 | N3  | C23 | 127.5(8) | C61  | C60  | C59  | 120.0     |
| C21 | N3  | C20 | 107.8(8) | C62  | C61  | C60  | 120.0     |
| C21 | N3  | C23 | 124.0(8) | C61  | C62  | C57  | 120.0     |
| C21 | N4  | C22 | 108.9(8) | C65  | C64  | C69  | 120.0     |
| C21 | N4  | C35 | 123.0(8) | C65  | C64  | C70  | 122(2)    |
| C22 | N4  | C35 | 128.0(8) | C69  | C64  | C70  | 118(3)    |
| N1  | C1  | P1  | 126.8(7) | C64  | C65  | C66  | 120.0     |
| C3  | C1  | P1  | 121.9(7) | C67  | C66  | C65  | 120.0     |
| C3  | C1  | N1  | 107.9(8) | C68  | C67  | C66  | 120.0     |
| N1  | C2  | Se1 | 126.0(7) | C67  | C68  | C69  | 120.0     |



|     |     |     |          |      |      |      |           |
|-----|-----|-----|----------|------|------|------|-----------|
| N1  | C2  | N2  | 108.1(7) | C68  | C69  | C64  | 120.0     |
| N2  | C2  | Se1 | 125.6(7) | C65S | C64S | C69S | 120.0     |
| N2  | C3  | P2  | 131.0(7) | C65S | C64S | C70S | 115(2)    |
| C1  | C3  | P2  | 120.6(7) | C69S | C64S | C70S | 124(2)    |
| C1  | C3  | N2  | 107.6(8) | C64S | C65S | C66S | 120.0     |
| N1  | C4  | C5  | 111.3(7) | C67S | C66S | C65S | 120.0     |
| C4  | C5  | C6  | 111.8(8) | C68S | C67S | C66S | 120.0     |
| C7  | C6  | C5  | 112.6(8) | C69S | C68S | C67S | 120.0     |
| C9  | C8  | Rh1 | 71.4(6)  | C68S | C69S | C64S | 120.0     |
| C9  | C8  | C15 | 125.8(9) | C58A | C57A | C62A | 120.0     |
| C15 | C8  | Rh1 | 112.7(7) | C58A | C57A | C63A | 127.5(18) |
| C8  | C9  | Rh1 | 70.2(6)  | C62A | C57A | C63A | 112.5(18) |
| C8  | C9  | C10 | 124.7(9) | C57A | C58A | C59A | 120.0     |
| C10 | C9  | Rh1 | 112.8(7) | C58A | C59A | C60A | 120.0     |
| C9  | C10 | C11 | 111.4(9) | C61A | C60A | C59A | 120.0     |
| C12 | C11 | C10 | 113.6(9) | C62A | C61A | C60A | 120.0     |
| C11 | C12 | Rh1 | 109.6(7) | C61A | C62A | C57A | 120.0     |
| C13 | C12 | Rh1 | 71.8(6)  |      |      |      |           |

Due to the lower quality of the structures determined from single crystals of 8–11 no discussion of any structural parameters was performed. However, the composition of the (main) product could be confirmed as evidenced by the figures below.

#### 4.3. 8

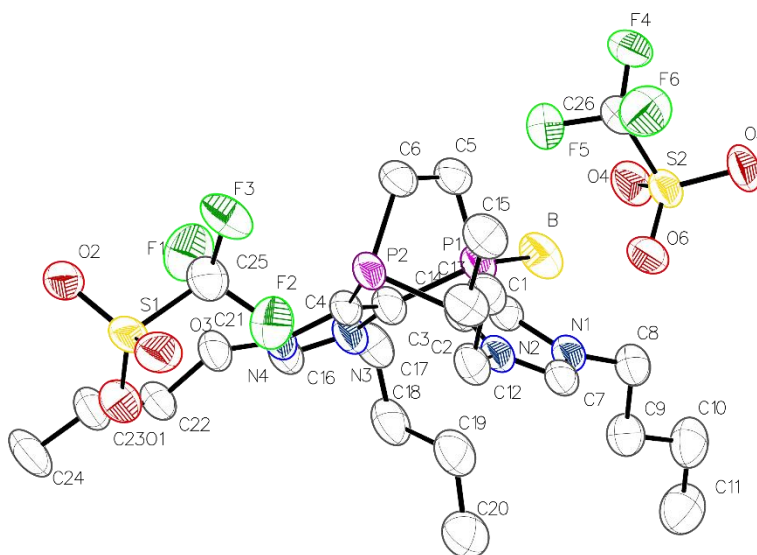

**Figure S29.** Molecular structure of **8** in the single crystal. Thermal ellipsoids are set at 50 % probability level. Hydrogen atoms were omitted for clarity.

4.4. 9

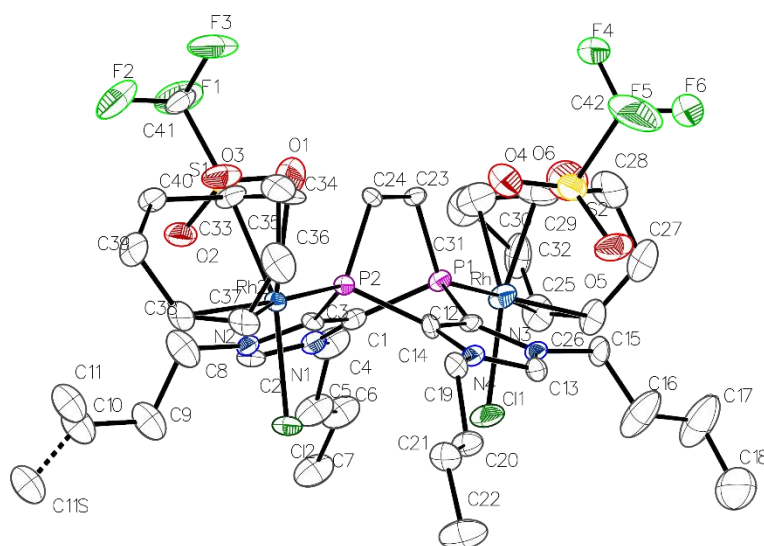

**Figure S30.** Molecular structure of **9** in the single crystal. Thermal ellipsoids are set at 50 % probability level. Hydrogen atoms and solvent molecules were omitted for clarity.

4.5. 10

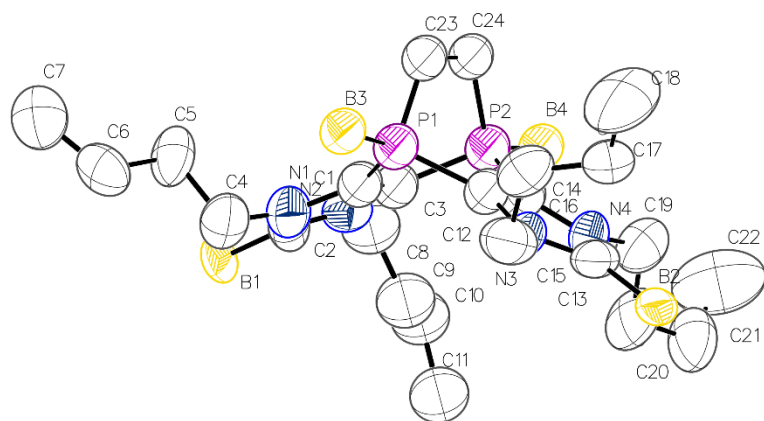

**Figure S31.** Molecular structure of **10** in the single crystal. Thermal ellipsoids are set at 50 % probability level. Hydrogen atoms and solvent molecules were omitted for clarity.

4.6. 11

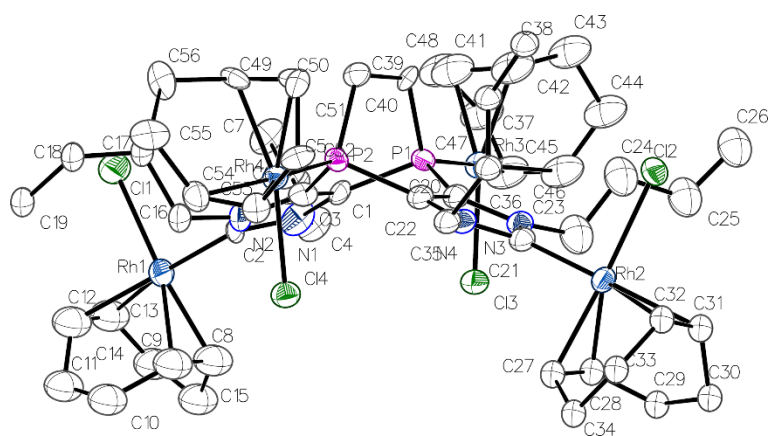

**Figure S32.** Molecular structure of **11** in the single crystal. Thermal ellipsoids are set at 50 % probability level. Hydrogen atoms and solvent molecules were omitted for clarity.

## 5. Additional figures

### 5.1. FMOs of 2

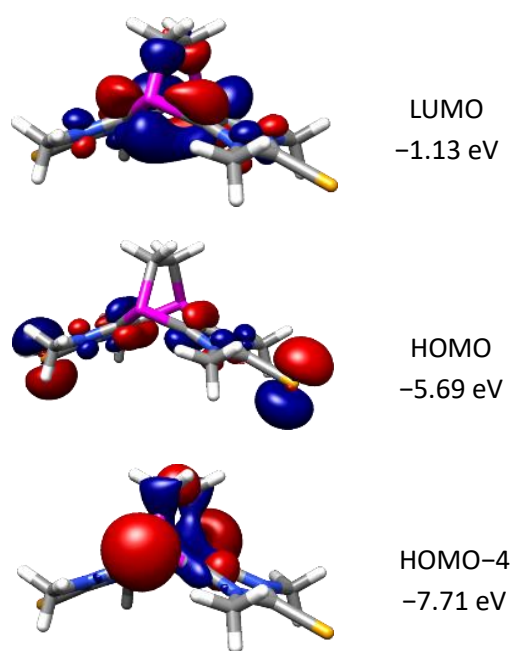

*Figure S33* Selected FMOs of compound **2<sup>Me</sup>**.

### 5.2. FMOs of 7

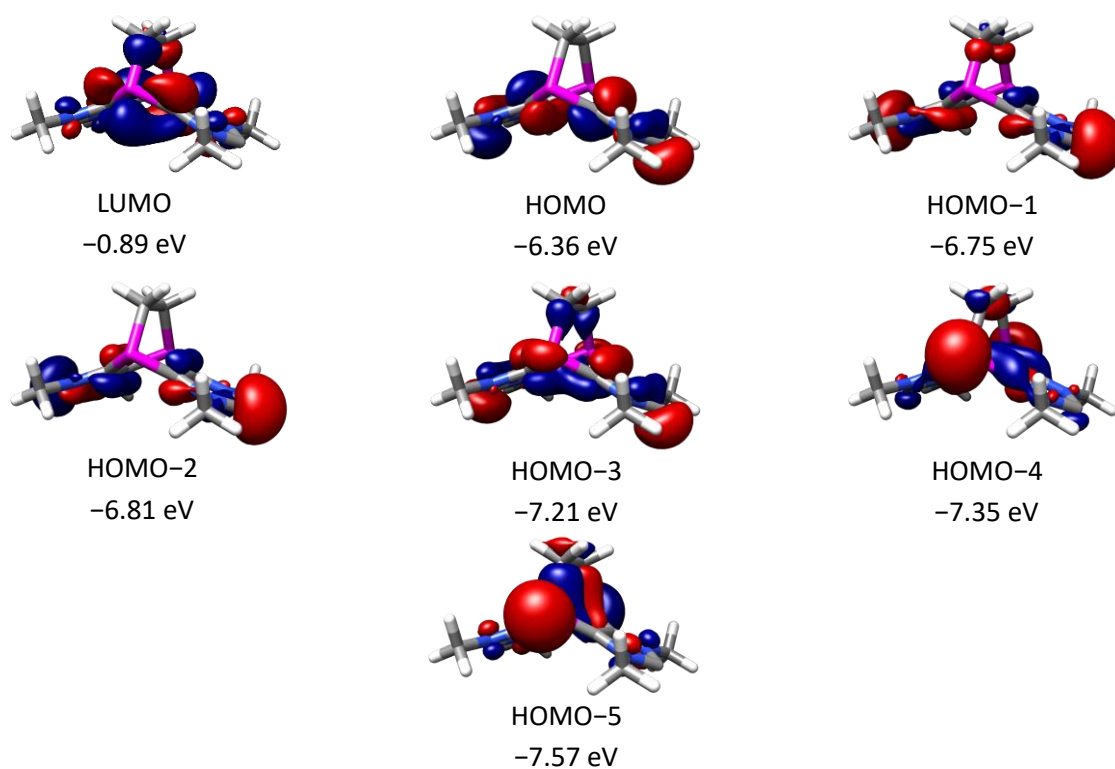

*Figure S34* Selected FMOs of compound **7<sup>Me</sup>**.

## 6. Computational details

All geometric optimisation and energy calculations were performed with *ORCA 5.0*.<sup>5,6</sup> Structures were optimised at the TPSS-D4/def2-TZVP/CPCM<sub>THF</sub> level of theory which combines the TPSS<sup>7</sup> meta-GGA density functional with the charge dependent atom-pairwise DFT-D4 dispersion correction which uses the D4(EEQ)-ATM dispersion model<sup>8</sup> and the def2-TZVP basis set<sup>9-12</sup> using the conductor-like polarisable continuum model (CPCM)<sup>13</sup> for THF ( $\epsilon = 7.25$ ). The minimum or transition state nature of the compounds has been determined by numerical frequency calculations. All minima have zero imaginary frequencies below  $-50 \text{ cm}^{-1}$  which can be the numerical error according to the *ORCA 5.0.4* manual.<sup>14</sup> If single imaginary frequencies between 0 and  $-50 \text{ cm}^{-1}$  appeared they were checked carefully and in all cases only belonged to small rotations of *N*-Me substituent whose contributions in energy difference fall within the method's error margins. Transition states possess only one imaginary frequency that describes the transition from starting material to product. The transition state has been computed with the help of the nudge elastic band optimiser (NEB)<sup>6,15</sup> as implemented in *ORCA 5.0*. Single-point calculations were performed at the PW6B95-D4/def2-QZVP/CPCM<sub>THF</sub> level of theory which combines the PW6B95 hybrid-meta-GGA functional<sup>16</sup> with the larger def2-QZVP basis set.<sup>9-12</sup> NICS(1) values were calculated at the B3LYP-D4/def2-TZVPPD level of theory combining the hybrid functional B3LYP<sup>17</sup> with the def2-TZVPPD basis set<sup>9-12</sup> and using the NMR module of *ORCA 5.0* utilising Gauge including atomic orbitals (GIAOs).<sup>18</sup> Values were obtained by calculating the NICS(1) value of benzene at the same levels of theory. The B3LYP functional was chosen here for general comparability as it is often used, performed well for the synthesised systems in a self-conducted small study and gave reliable results with relatively low resource cost. The density-fitting RI-J (def2/J)<sup>9,19</sup> approach was used to accelerate geometry optimisations, numerical frequency and single point energy calculations.

The graphical representations of the calculated structures and their frontier molecular orbitals (FMOs) were generated with *UCSF Chimera 1.15*.<sup>20</sup>

Below are listed the optimised cartesian coordinates (in Å) with electronic energies (in Hartree) in THF solution. All structures of new compounds were computed as model compounds with *N*-methyl instead of *N*-*n*-butyl substitution to save computational costs. Zero point energies ( $E_{ZPE}$ ), thermal corrections ( $E_T$ ) at 298.15 K and entropy corrections ( $E_S$ ) were taken from the optimisation calculations.

### 6.1. **1**<sup>Me</sup>

**Table S7.** Computational data for **1**<sup>Me</sup>.

| <b>1</b> <sup>Me</sup>   |          |          |          |
|--------------------------|----------|----------|----------|
| $E = -6097.147735690066$ |          |          |          |
| $E_{ZPE} = 0.21546057$   |          |          |          |
| $E_T = 0.01970719$       |          |          |          |
| $E_S = -0.06819458$      |          |          |          |
| C                        | -6.63660 | -6.76350 | -0.57438 |
| C                        | -7.01810 | -5.46794 | -0.98979 |
| C                        | -4.58926 | -4.59093 | -0.48861 |
| C                        | -4.20813 | -5.88621 | -0.07202 |
| P                        | -6.11505 | -3.97317 | -1.07857 |
| P                        | -5.11074 | -7.38130 | 0.01539  |
| N                        | -7.76343 | -7.56272 | -0.71510 |
| N                        | -8.35413 | -5.55730 | -1.35753 |
| N                        | -3.46237 | -3.79177 | -0.34810 |
| N                        | -2.87256 | -5.79650 | 0.29726  |

|    |           |          |          |
|----|-----------|----------|----------|
| C  | -9.13716  | -4.42944 | -1.84950 |
| H  | -9.15479  | -3.64136 | -1.09138 |
| H  | -8.68712  | -4.04651 | -2.76985 |
| H  | -10.14786 | -4.78917 | -2.04432 |
| C  | -7.79637  | -8.98343 | -0.38623 |
| H  | -7.06122  | -9.51543 | -0.99657 |
| H  | -7.56282  | -9.11693 | 0.67388  |
| H  | -8.80108  | -9.34835 | -0.60113 |
| C  | -2.08982  | -6.92415 | 0.79013  |
| H  | -2.05535  | -7.70533 | 0.02542  |
| H  | -1.08449  | -6.55997 | 1.00360  |
| H  | -2.55170  | -7.31810 | 1.69986  |
| C  | -3.42922  | -2.37115 | -0.67734 |
| H  | -2.42210  | -2.00828 | -0.47040 |
| H  | -3.67088  | -2.23765 | -1.73562 |
| H  | -4.15839  | -1.83731 | -0.06143 |
| Se | -0.70978  | -3.90794 | 0.48230  |
| C  | -2.40381  | -4.51871 | 0.13232  |
| C  | -8.82250  | -6.83540 | -1.19380 |
| Se | -10.51670 | -7.44603 | -1.54318 |

## 6.2. 2<sup>Me</sup>

**Table S8.** Computational data for 2<sup>Me</sup>.

2<sup>Me</sup>

$E = -6175.906245036859$

$E_{ZPE} = 0.27120048$

$E_T = 0.02213321$

$E_S = -0.07289518$

---

|   |          |           |          |
|---|----------|-----------|----------|
| C | -5.37582 | -7.63244  | 0.34730  |
| C | -6.00388 | -6.84459  | -0.57853 |
| C | -3.86284 | -5.22939  | -0.65073 |
| C | -3.23837 | -6.01434  | 0.27960  |
| P | -5.66913 | -5.06727  | -0.75398 |
| P | -4.14421 | -6.98707  | 1.51812  |
| N | -5.94910 | -8.89262  | 0.27088  |
| N | -6.95474 | -7.63168  | -1.20980 |
| N | -2.87343 | -4.55403  | -1.34895 |
| N | -1.87401 | -5.81072  | 0.13958  |
| C | -7.85496 | -7.21076  | -2.27926 |
| H | -8.89039 | -7.35653  | -1.96349 |
| H | -7.66639 | -6.15564  | -2.48089 |
| H | -7.66454 | -7.80722  | -3.17446 |
| C | -5.57990 | -10.06176 | 1.06346  |
| H | -4.77313 | -9.76973  | 1.73680  |
| H | -6.44502 | -10.40480 | 1.63533  |
| H | -5.24747 | -10.86285 | 0.39922  |
| C | -0.81910 | -6.46067  | 0.91186  |
| H | -1.29441 | -7.12108  | 1.63794  |
| H | -0.17614 | -7.03549  | 0.24133  |
| H | -0.22038 | -5.70390  | 1.42360  |
| C | -3.07639 | -3.61198  | -2.44573 |
| H | -2.55019 | -3.96840  | -3.33401 |
| H | -4.14763 | -3.54890  | -2.64048 |
| H | -2.68497 | -2.63150  | -2.16487 |
| C | -1.64151 | -4.91219  | -0.86810 |

|    |          |           |          |
|----|----------|-----------|----------|
| C  | -6.92195 | -8.90032  | -0.69383 |
| C  | -5.21515 | -5.55503  | 2.12302  |
| C  | -5.91185 | -4.66151  | 1.07402  |
| H  | -5.95714 | -6.02237  | 2.77811  |
| H  | -5.57834 | -3.62400  | 1.17603  |
| Se | -7.96161 | -10.33376 | -1.21020 |
| Se | -0.00154 | -4.31842  | -1.46886 |
| H  | -6.99619 | -4.67496  | 1.22198  |
| H  | -4.55069 | -4.95579  | 2.75330  |

### 6.3. Ethene

**Table S9.** Computational data for ethene.

---

**Ethene**  
 $E = -78.726416921569$   
 $E_{ZPE} = 0.050233$   
 $E_T = 0.00305219$   
 $E_S = -0.02487869$

---

|   |          |          |          |
|---|----------|----------|----------|
| C | -2.62830 | 0.55359  | -0.00020 |
| H | -3.71536 | 0.51851  | 0.00021  |
| H | -2.11074 | -0.40296 | -0.00059 |
| C | -1.96480 | 1.70925  | -0.00023 |
| H | -2.48236 | 2.66580  | 0.00016  |
| H | -0.87774 | 1.74433  | -0.00064 |

### 6.4. 2<sup>Me</sup>-TS

**Table S10.** Computational data for 2<sup>Me</sup>-TS.

---

**2<sup>Me</sup>-TS**  
 $E = -6175.861062308280$   
 $E_{ZPE} = 0.26772679$   
 $E_T = 0.02197965$   
 $E_S = -0.07280527$   
 $imf = -283.83 \text{ cm}^{-1}$

---

|   |          |          |          |
|---|----------|----------|----------|
| C | -0.43619 | -1.65116 | -0.11573 |
| C | -1.05269 | -0.84065 | -1.06094 |
| C | 1.08505  | 0.73447  | -1.09954 |
| C | 1.70310  | -0.07906 | -0.15760 |
| P | -0.64496 | 0.83599  | -1.45275 |
| P | 0.91515  | -1.21925 | 0.94158  |
| N | -1.26326 | -2.75388 | 0.06596  |
| N | -2.23436 | -1.47936 | -1.42220 |
| N | 2.03002  | 1.67339  | -1.49804 |
| N | 3.00392  | 0.39329  | -0.01675 |
| C | -3.19951 | -0.98036 | -2.39753 |
| H | -4.00507 | -0.44110 | -1.89129 |
| H | -2.67656 | -0.30921 | -3.08124 |
| H | -3.61570 | -1.83168 | -2.93789 |
| C | -0.99240 | -3.85848 | 0.98106  |
| H | 0.07879  | -4.07054 | 0.96266  |
| H | -1.29991 | -3.59185 | 1.99633  |
| H | -1.56238 | -4.72382 | 0.64058  |
| C | 4.01804  | -0.17080 | 0.86937  |
| H | 3.72634  | -1.19447 | 1.11070  |

|    |          |          |          |
|----|----------|----------|----------|
| H  | 4.97897  | -0.15796 | 0.35262  |
| H  | 4.09045  | 0.42143  | 1.78563  |
| C  | 1.79646  | 2.73514  | -2.47220 |
| H  | 2.75981  | 3.02026  | -2.89707 |
| H  | 1.12989  | 2.35356  | -3.24830 |
| H  | 1.33989  | 3.60143  | -1.98467 |
| C  | 3.21280  | 1.46706  | -0.83919 |
| C  | -2.36872 | -2.65684 | -0.73682 |
| C  | -0.43391 | 0.64055  | 1.86171  |
| C  | -1.05718 | 1.45518  | 0.91451  |
| H  | -1.02973 | -0.08439 | 2.40830  |
| H  | -0.64516 | 2.43869  | 0.70937  |
| H  | 0.45095  | 1.00736  | 2.37348  |
| H  | -2.12310 | 1.34273  | 0.74018  |
| Se | -3.74677 | -3.86910 | -0.89253 |
| Se | 4.77933  | 2.41522  | -1.03229 |

## 6.5. $7^{\text{Me}}$

**Table S11.** Computational data for  $7^{\text{Me}}$ .

|                               |          |           |          |
|-------------------------------|----------|-----------|----------|
| $7^{\text{Me}}$               |          |           |          |
| $E = -1370.391081703325$      |          |           |          |
| $E_{\text{ZPE}} = 0.26654919$ |          |           |          |
| $E_{\text{T}} = 0.01877921$   |          |           |          |
| $E_{\text{S}} = -0.06430423$  |          |           |          |
| C                             | -5.39778 | -7.62016  | 0.36742  |
| C                             | -6.01740 | -6.83777  | -0.56914 |
| C                             | -3.83819 | -5.25330  | -0.68087 |
| C                             | -3.22100 | -6.03346  | 0.25880  |
| P                             | -5.64319 | -5.07139  | -0.77853 |
| P                             | -4.14061 | -6.97555  | 1.51144  |
| N                             | -6.01100 | -8.86487  | 0.29941  |
| N                             | -6.98205 | -7.63943  | -1.16656 |
| N                             | -2.82294 | -4.61397  | -1.38121 |
| N                             | -1.85607 | -5.83633  | 0.09010  |
| C                             | -7.87637 | -7.19721  | -2.23412 |
| H                             | -8.49409 | -8.04871  | -2.51849 |
| H                             | -8.51183 | -6.37988  | -1.88148 |
| H                             | -7.29479 | -6.85478  | -3.09446 |
| C                             | -5.64667 | -10.01145 | 1.12889  |
| H                             | -4.59690 | -10.27296 | 0.96947  |
| H                             | -5.80272 | -9.77810  | 2.18585  |
| H                             | -6.28520 | -10.84446 | 0.83594  |
| C                             | -0.82241 | -6.49241  | 0.88784  |
| H                             | -0.89878 | -7.57829  | 0.78354  |
| H                             | 0.14392  | -6.15088  | 0.51768  |
| H                             | -0.93160 | -6.22376  | 1.94227  |
| C                             | -3.04192 | -3.68254  | -2.48571 |
| H                             | -2.06378 | -3.35941  | -2.84114 |
| H                             | -3.58710 | -4.17786  | -3.29394 |
| H                             | -3.61591 | -2.81750  | -2.14190 |
| C                             | -1.57360 | -4.96132  | -0.92963 |
| C                             | -6.99946 | -8.91242  | -0.65248 |
| C                             | -5.18493 | -5.51323  | 2.10658  |
| C                             | -5.87026 | -4.62462  | 1.04719  |
| H                             | -5.93161 | -5.95733  | 2.77250  |



|   |          |          |         |
|---|----------|----------|---------|
| H | -5.51579 | -3.59219 | 1.12874 |
| H | -6.95364 | -4.61380 | 1.20310 |
| H | -4.50764 | -4.91524 | 2.72451 |

## 7. References

- 1 G. R. Fulmer, A. J. M. Miller, N. H. Sherden, H. E. Gottlieb, A. Nudelman, B. M. Stoltz, J. E. Bercaw and K. I. Goldberg, *Organometallics*, 2010, **29**, 2176.
- 2 R. H. Blessing, *Acta Cryst. A*, 1995, **51 ( Pt 1)**, 33.
- 3 G. M. Sheldrick, SHELXS97 and SHELXL97, University of Göttingen, 1997.
- 4 O. V. Dolomanov, L. J. Bourhis, R. J. Gildea, J. A. K. Howard and H. Puschmann, *J. Appl. Cryst.*, 2009, **42**, 339.
- 5 a) F. Neese, *Wiley Interdiscip. Rev. Comput. Mol. Sci.*, 2012, **2**, 73; b) F. Neese, *Wiley Interdiscip. Rev. Comput. Mol. Sci.*, 2022, **12**;
- 6 F. Neese, F. Wennmohs, U. Becker and C. Riplinger, *J. Chem. Phys.*, 2020, **152**, 224108.
- 7 J. Tao, J. P. Perdew, V. N. Staroverov and G. E. Scuseria, *Phys. Rev. Lett.*, 2003, **91**, 146401.
- 8 a) E. Caldeweyher, S. Ehlert, A. Hansen, H. Neugebauer, S. Spicher, C. Bannwarth and S. Grimme, *J. Chem. Phys.*, 2019, **150**, 154122; b) E. Caldeweyher, J.-M. Mewes, S. Ehlert and S. Grimme, *Phys. Chem. Chem. Phys.*, 2020, **22**, 8499;
- 9 F. Weigend, M. Häser, H. Patzelt and R. Ahlrichs, *Chem. Phys. Lett.*, 1998, **294**, 143.
- 10 F. Weigend and R. Ahlrichs, *Phys. Chem. Chem. Phys.*, 2005, **7**, 3297.
- 11 F. Weigend, F. Furche and R. Ahlrichs, *J. Chem. Phys.*, 2003, **119**, 12753.
- 12 D. Rappoport and F. Furche, *J. Chem. Phys.*, 2010, **133**, 134105.
- 13 V. Barone and M. Cossi, *J. Phys. Chem. A*, 1998, **102**, 1995.
- 14 ORCA 5.0.4 Manual, <https://orcaforum.kofo.mpg.de>, (accessed 8 November 2023).
- 15 a) V. Ásgeirsson, B. O. Birgisson, R. Bjornsson, U. Becker, F. Neese, C. Riplinger and H. Jónsson, *J. Chem. Theory Comput.*, 2021, **17**, 4929; b) B. J. Berne, G. Ciccotti and D. F. Coker, eds., *Classical and quantum dynamics in condensed phase simulations. Proceedings of the International School of Physics "Computer Simulation of Rare Events and the Dynamics of Classical and Quantum Condensed-Phase Systems"*; Euroconference on "Technical Advances in Partical-Based Computational Material Sciences", Lerici, Villa Marigola, 7 July - 18 July 1997, WORLD SCIENTIFIC, Singapore, 1998; c) G. Henkelman and H. Jónsson, *J. Chem. Phys.*, 2000, **113**, 9978; d) G. Mills, H. Jónsson and G. K. Schenter, *Surf. Sci.*, 1995, **324**, 305;
- 16 Y. Zhao and D. G. Truhlar, *J. Phys. Chem. A*, 2005, **109**, 5656.
- 17 a) A. D. Becke, *J. Chem. Phys.*, 1993, **98**, 5648; b) P. J. Stephens, F. J. Devlin, C. F. Chabalowski and M. J. Frisch, *J. Phys. Chem.*, 1994, **98**, 11623;
- 18 a) R. Ditchfield, *J. Chem. Phys.*, 1972, **56**, 5688; b) G. Schreckenbach and T. Ziegler, *J. Phys. Chem.*, 1995, **99**, 606; c) F. London, *J. Phys. Radium*, 1937, **8**, 397; d) T. Helgaker, M. Jaszuński and K. Ruud, *Chem. Rev.*, 1999, **99**, 293;
- 19 a) F. Weigend, *Phys. Chem. Chem. Phys.*, 2006, **8**, 1057; b) K. Eichkorn, F. Weigend, O. Treutler and R. Ahlrichs, *Theor. Chem. Acc.*, 1997, **97**, 119;
- 20 E. F. Pettersen, T. D. Goddard, C. C. Huang, G. S. Couch, D. M. Greenblatt, E. C. Meng and T. E. Ferrin, *J. Comput. Chem.*, 2004, **25**, 1605.
